# Supplementary material for: Ecological–Health Risk Assessments of Copper in the Sediments: A Review and Synthesis
Source: MDPI journal article supplement (doi:10.3390/pollutants2030018), 2022-06-28
Supplement: s1 [file s1]

*Review*

# **Ecological-Health Risk Assessments of Copper in the sediments: A review and synthesis**

Chee Kong Yap<sup>1\*</sup>, Muhammad Saleem<sup>2</sup>, Wen Siang Tan<sup>3,4</sup>, Wan Mohd Syazwan<sup>1</sup>, Noor Azrizal-Wahid<sup>1</sup>, Rosimah Nulit<sup>1</sup>, Mohd. Hafiz Ibrahim<sup>1</sup>, Muskhazli Mustafa<sup>1</sup>, Mohd Amiruddin Abd Rahman<sup>5</sup>, Franklin Berandah Edward<sup>6</sup>, Takaomi Arai<sup>7</sup>, Wan Hee Cheng<sup>8</sup>, Hideo Okamura<sup>9</sup>, Mohamad Saupi Ismail<sup>10</sup>, Krishnan Kumar<sup>8</sup>, Ram Avtar<sup>11</sup>, Khalid Awadh Al-Mutairi<sup>12</sup>, Salman Abdo Al-Shami<sup>13</sup>, Geetha Subramaniam<sup>8</sup>, and Ling Shing Wong<sup>8</sup>

1 Department of Biology, Faculty of Science, Universiti Putra Malaysia, 43400 UPM Serdang, Selangor, Malaysia; mhdysazwan@upm.edu.my (W.M.S.); azrizal\_wahid@yahoo.com (N.A.W.); rosimah@upm.edu.my (R.N.); mhafiz\_ibrahim@upm.edu.my (M.H.I.); muskhazli@upm.edu.my (M.M.)

2 Department of Pathology, School of Medicine and Health Sciences, University of North Dakota, Grand Forks, North Dakota, 58202, USA; msaleemqau@yahoo.com; muhammad.saleem.1@UND.edu (M.S.)

3 Department of Microbiology, Faculty of Biotechnology and Biomolecular Sciences, Universiti Putra Malaysia, 43400 UPM Serdang, Selangor, Malaysia; wstan@upm.edu.my

4. Laboratory of Vaccines and Biomolecules, Institute of Bioscience, Universiti Putra Malaysia, 43400 UPM Serdang, Selangor, Malaysia; wstan@upm.edu.my

5 Department of Physics, Faculty of Science, Universiti Putra Malaysia, 43400 UPM Serdang, Selangor, Malaysia; mohdamir@upm.edu.my

6 Natural Resources and Environment Board, Petra Jaya, 93050 Kuching, Sarawak, Malaysia; franklin\_dwr@yahoo.com

7 Environmental and Life Sciences Programme, Faculty of Science, Universiti Brunei Darussalam, Jalan Tungku Link, Gadong, BE 1410, Brunei Darussalam; takaomi.arai@ubd.edu.bn

8 Faculty of Health and Life Sciences, Inti International University, Persiaran Perdana BBN, 71800 Nilai, Negeri Sembilan, Malaysia; wanhee.cheng@newinti.edu.my (W.H.C.); kumar.krishnan@newinti.edu.my (K.K.); geetha.subramaniam@newinti.edu.my (G.S.); lingshing.wong@newinti.edu.my (L.S.W.)

9 Faculty of Maritime Sciences, Graduate School of Maritime Sciences, Kobe University, Kobe, 658-0022, Japan; okamura@maritime.kobe-u.ac.jp

10 Fisheries Research Institute, Batu Maung, Pulau Pinang 11960, Malaysia; saupi@rocketmail.com

11 Graduate School of Environmental Science, Hokkaido University, Japan; ram@ees.hokudai.ac.jp

12 Department of Biology, Faculty of Science, University of Tabuk, Tabuk P.O. Box 741, Saudi Arabia; kmutairi@ut.edu.sa

13 Indian River Research and Education Center, IFAS, University of Florida, Fort Pierce, FL 34945, USA; alshami200@gmail.com

\*Corresponding author: yapckong@hotmail.com; yapchee@upm.edu.my

**Table S1.** The minimum range of Cu concentrations (mg/kg dry weight) in the sediments cited from 125 papers the literature published between 1980 and 2022, and their calculated values of geoaccumulation index (Igeo), contamination factor (CF), ecological risk (ER), hazard quotient ingestion (HQ<sub>ing</sub>), hazard quotient inhalation (HQ<sub>inh</sub>), hazard quotient derma contact (HQ<sub>der</sub>), hazard index (HI) for adults and children based on the cited Cu data.

|    |                                                           | Cu    | Igeo  | CF   | ER    | Adults<br>HQ <sub>ing</sub> | Adults<br>HQ <sub>inh</sub> | Adults<br>HQ <sub>der</sub> | Adults<br>HI | Children<br>HQ <sub>ing</sub> | Children<br>HQ <sub>inh</sub> | Children<br>HQ <sub>der</sub> | Children<br>HI | Ref |
|----|-----------------------------------------------------------|-------|-------|------|-------|-----------------------------|-----------------------------|-----------------------------|--------------|-------------------------------|-------------------------------|-------------------------------|----------------|-----|
| 1  | Tolo Harbour, Hong Kong                                   | 6.80  | -1.66 | 0.48 | 2.38  | 3.12E-04                    | 2.85E-08                    | 3.16E-05                    | 3.43E-04     | 2.32E-03                      | 6.33E-08                      | 1.24E-05                      | 2.34E-03       | 1   |
| 2  | Belfast Lough, Ireland                                    | 6.50  | -1.72 | 0.45 | 2.27  | 2.98E-04                    | 2.72E-08                    | 3.03E-05                    | 3.28E-04     | 2.22E-03                      | 6.05E-08                      | 1.18E-05                      | 2.23E-03       | 2   |
| 3  | Chao Phraya Estuary, Thailand                             | 3.34  | -2.68 | 0.23 | 1.17  | 1.53E-04                    | 1.40E-08                    | 1.55E-05                    | 1.69E-04     | 1.14E-03                      | 3.11E-08                      | 6.09E-06                      | 1.15E-03       | 3   |
| 4  | Ganges Estuary, India                                     | 4.00  | -2.42 | 0.28 | 1.40  | 1.83E-04                    | 1.68E-08                    | 1.86E-05                    | 2.02E-04     | 1.37E-03                      | 3.72E-08                      | 7.29E-06                      | 1.37E-03       | 4   |
| 5  | Java Sea, Indonesia                                       | 6.00  | -1.84 | 0.42 | 2.10  | 2.75E-04                    | 2.51E-08                    | 2.79E-05                    | 3.03E-04     | 2.05E-03                      | 5.58E-08                      | 1.09E-05                      | 2.06E-03       | 5   |
| 6  | Fly River Delta, Papua New Guinea                         | 20.00 | -0.10 | 1.40 | 6.99  | 9.17E-04                    | 8.38E-08                    | 9.31E-05                    | 1.01E-03     | 6.84E-03                      | 1.86E-07                      | 3.65E-05                      | 6.87E-03       | 6   |
| 7  | Singapore River                                           | 10.00 | -1.10 | 0.70 | 3.50  | 4.59E-04                    | 4.19E-08                    | 4.65E-05                    | 5.05E-04     | 3.42E-03                      | 9.30E-08                      | 1.82E-05                      | 3.44E-03       | 7   |
| 8  | Tokyo Bay, Japan                                          | 16.60 | -0.37 | 1.16 | 5.80  | 7.61E-04                    | 6.95E-08                    | 7.73E-05                    | 8.38E-04     | 5.67E-03                      | 1.54E-07                      | 3.03E-05                      | 5.70E-03       | 8   |
| 9  | Bintulu coastal waters, Malaysia                          | 7.00  | -1.62 | 0.49 | 2.45  | 3.21E-04                    | 2.93E-08                    | 3.26E-05                    | 3.54E-04     | 2.39E-03                      | 6.51E-08                      | 1.28E-05                      | 2.41E-03       | 9   |
| 10 | Juru River, Malaysia                                      | 14.00 | -0.62 | 0.98 | 4.90  | 6.42E-04                    | 5.86E-08                    | 6.52E-05                    | 7.07E-04     | 4.78E-03                      | 1.30E-07                      | 2.55E-05                      | 4.81E-03       | 10  |
| 11 | Victoria Harbour, Hong Kong                               | 45.20 | 1.08  | 3.16 | 15.80 | 2.07E-03                    | 1.89E-07                    | 2.10E-04                    | 2.28E-03     | 1.54E-02                      | 4.21E-07                      | 8.24E-05                      | 1.55E-02       | 11  |
| 12 | Scheldt Estuarine, Netherlands                            | 1.00  | -4.42 | 0.07 | 0.35  | 4.59E-05                    | 4.19E-09                    | 4.65E-06                    | 5.05E-05     | 3.42E-04                      | 9.30E-09                      | 1.82E-06                      | 3.44E-04       | 12  |
| 13 | Johore Straits, Malaysia                                  | 10.80 | -0.99 | 0.76 | 3.78  | 4.95E-04                    | 4.52E-08                    | 5.03E-05                    | 5.46E-04     | 3.69E-03                      | 1.00E-07                      | 1.97E-05                      | 3.71E-03       | 13  |
| 14 | Osaka Bay, Japan                                          | 18.00 | -0.25 | 1.26 | 6.29  | 8.25E-04                    | 7.54E-08                    | 8.38E-05                    | 9.09E-04     | 6.15E-03                      | 1.67E-07                      | 3.28E-05                      | 6.18E-03       | 14  |
| 15 | Izmir Bay, Turkey                                         | 4.00  | -2.42 | 0.28 | 1.40  | 1.83E-04                    | 1.68E-08                    | 1.86E-05                    | 2.02E-04     | 1.37E-03                      | 3.72E-08                      | 7.29E-06                      | 1.37E-03       | 15  |
| 16 | Offshore and intertidal west coast of Peninsular Malaysia | 0.25  | -6.42 | 0.02 | 0.09  | 1.15E-05                    | 1.05E-09                    | 1.16E-06                    | 1.26E-05     | 8.54E-05                      | 2.33E-09                      | 4.56E-07                      | 8.59E-05       | 16  |
| 17 | Pearl River Delta, China                                  | 8.70  | -1.30 | 0.61 | 3.04  | 3.99E-04                    | 3.64E-08                    | 4.05E-05                    | 4.39E-04     | 2.97E-03                      | 8.09E-08                      | 1.59E-05                      | 2.99E-03       | 17  |
| 18 | Coastal Alang-Sosiya, India                               | 85.20 | 1.99  | 5.96 | 29.79 | 3.91E-03                    | 3.57E-07                    | 3.97E-04                    | 4.30E-03     | 2.91E-02                      | 7.93E-07                      | 1.55E-04                      | 2.93E-02       | 18  |
| 19 | Semarang, Indonesia                                       | 33.00 | 0.62  | 2.31 | 11.54 | 1.51E-03                    | 1.38E-07                    | 1.54E-04                    | 1.67E-03     | 1.13E-02                      | 3.07E-07                      | 6.01E-05                      | 1.13E-02       | 19  |

|    |                                                      |       |       |      |       |          |          |          |          |          |          |          |          |    |
|----|------------------------------------------------------|-------|-------|------|-------|----------|----------|----------|----------|----------|----------|----------|----------|----|
| 20 | Kelana Jaya Lakes, Malaysia                          | 7.37  | -1.54 | 0.52 | 2.58  | 3.38E-04 | 3.09E-08 | 3.43E-05 | 3.72E-04 | 2.52E-03 | 6.86E-08 | 1.34E-05 | 2.53E-03 | 20 |
| 21 | South west coast, Spain                              | 41.00 | 0.93  | 2.87 | 14.34 | 1.88E-03 | 1.72E-07 | 1.91E-04 | 2.07E-03 | 1.40E-02 | 3.81E-07 | 7.47E-05 | 1.41E-02 | 21 |
| 22 | Mangrove area, Singapore                             | 7.06  | -1.60 | 0.49 | 2.47  | 3.24E-04 | 2.96E-08 | 3.29E-05 | 3.57E-04 | 2.41E-03 | 6.57E-08 | 1.29E-05 | 2.43E-03 | 22 |
| 23 | Ebrie Lagoon, Ivory Coast                            | 3.00  | -2.84 | 0.21 | 1.05  | 1.38E-04 | 1.26E-08 | 1.40E-05 | 1.52E-04 | 1.03E-03 | 2.79E-08 | 5.47E-06 | 1.03E-03 | 23 |
| 24 | Western Moreton Bay, Australia                       | 1.00  | -4.42 | 0.07 | 0.35  | 4.59E-05 | 4.19E-09 | 4.65E-06 | 5.05E-05 | 3.42E-04 | 9.30E-09 | 1.82E-06 | 3.44E-04 | 24 |
| 25 | Balaton Lake, Hungary                                | 0.70  | -4.94 | 0.05 | 0.24  | 3.21E-05 | 2.93E-09 | 3.26E-06 | 3.54E-05 | 2.39E-04 | 6.51E-09 | 1.28E-06 | 2.41E-04 | 25 |
| 26 | Mandovy Estuary, India                               | 11.50 | -0.90 | 0.80 | 4.02  | 5.27E-04 | 4.82E-08 | 5.35E-05 | 5.81E-04 | 3.93E-03 | 1.07E-07 | 2.10E-05 | 3.95E-03 | 26 |
| 27 | Kranji and Tekong Island, Singapore                  | 7.70  | -1.48 | 0.54 | 2.69  | 3.53E-04 | 3.22E-08 | 3.58E-05 | 3.89E-04 | 2.63E-03 | 7.16E-08 | 1.40E-05 | 2.65E-03 | 27 |
| 28 | Izmit Bay, Turkey                                    | 60.60 | 1.50  | 4.24 | 21.19 | 2.78E-03 | 2.54E-07 | 2.82E-04 | 3.06E-03 | 2.07E-02 | 5.64E-07 | 1.10E-04 | 2.08E-02 | 28 |
| 29 | Agbabu Bitumen Deposit Area, Nigeria                 | 2.91  | -2.88 | 0.20 | 1.02  | 1.33E-04 | 1.22E-08 | 1.35E-05 | 1.47E-04 | 9.95E-04 | 2.71E-08 | 5.30E-06 | 1.00E-03 | 29 |
| 30 | Tg. Piai, Peninsular Malaysia                        | 3.43  | -2.64 | 0.24 | 1.20  | 1.57E-04 | 1.44E-08 | 1.60E-05 | 1.73E-04 | 1.17E-03 | 3.19E-08 | 6.25E-06 | 1.18E-03 | 30 |
| 31 | Mvudi River, South Africa                            | 13.20 | -0.70 | 0.92 | 4.62  | 6.05E-04 | 5.53E-08 | 6.14E-05 | 6.67E-04 | 4.51E-03 | 1.23E-07 | 2.41E-05 | 4.54E-03 | 31 |
| 32 | Lakes of southwest Japan                             | 13.00 | -0.72 | 0.91 | 4.55  | 5.96E-04 | 5.44E-08 | 6.05E-05 | 6.57E-04 | 4.44E-03 | 1.21E-07 | 2.37E-05 | 4.47E-03 | 32 |
| 33 | Kaoshiung Harbor, Taiwan                             | 5.00  | -2.10 | 0.35 | 1.75  | 2.29E-04 | 2.09E-08 | 2.33E-05 | 2.53E-04 | 1.71E-03 | 4.65E-08 | 9.11E-06 | 1.72E-03 | 33 |
| 34 | Pearl River Estuary, China                           | 8.90  | -1.27 | 0.62 | 3.11  | 4.08E-04 | 3.73E-08 | 4.14E-05 | 4.50E-04 | 3.04E-03 | 8.28E-08 | 1.62E-05 | 3.06E-03 | 34 |
| 35 | Western Xiamen Bay, China                            | 19.00 | -0.17 | 1.33 | 6.64  | 8.71E-04 | 7.96E-08 | 8.84E-05 | 9.60E-04 | 6.49E-03 | 1.77E-07 | 3.46E-05 | 6.53E-03 | 35 |
| 36 | Sepang River, Malaysia                               | 2.88  | -2.90 | 0.20 | 1.01  | 1.32E-04 | 1.21E-08 | 1.34E-05 | 1.45E-04 | 9.84E-04 | 2.68E-08 | 5.25E-06 | 9.90E-04 | 36 |
| 37 | Polluted drainage sediments from Peninsular Malaysia | 8.77  | -1.29 | 0.61 | 3.07  | 4.02E-04 | 3.67E-08 | 4.08E-05 | 4.43E-04 | 3.00E-03 | 8.16E-08 | 1.60E-05 | 3.01E-03 | 37 |
| 38 | Victoria Harbour, Hong Kong                          | 16.00 | -0.42 | 1.12 | 5.59  | 7.34E-04 | 6.70E-08 | 7.45E-05 | 8.08E-04 | 5.47E-03 | 1.49E-07 | 2.92E-05 | 5.50E-03 | 38 |
| 39 | Manchar Lake, Pakistan                               | 15.60 | -0.46 | 1.09 | 5.45  | 7.15E-04 | 6.53E-08 | 7.26E-05 | 7.88E-04 | 5.33E-03 | 1.45E-07 | 2.84E-05 | 5.36E-03 | 39 |
| 40 | East, South and West coasts of Peninsular Malaysia   | 12.90 | -0.73 | 0.90 | 4.51  | 5.92E-04 | 5.40E-08 | 6.00E-05 | 6.52E-04 | 4.41E-03 | 1.20E-07 | 2.35E-05 | 4.43E-03 | 40 |

|    |                                                                       |        |       |       |        |          |          |          |          |          |          |          |          |    |
|----|-----------------------------------------------------------------------|--------|-------|-------|--------|----------|----------|----------|----------|----------|----------|----------|----------|----|
| 41 | Old Nakagawa River, Japan                                             | 340.00 | 3.99  | 23.78 | 118.88 | 1.56E-02 | 1.42E-06 | 1.58E-03 | 1.72E-02 | 1.16E-01 | 3.16E-06 | 6.20E-04 | 1.17E-01 | 41 |
| 42 | Southern part of Peninsular Malaysia                                  | 9.48   | -1.18 | 0.66  | 3.31   | 4.35E-04 | 3.97E-08 | 4.41E-05 | 4.79E-04 | 3.24E-03 | 8.82E-08 | 1.73E-05 | 3.26E-03 | 42 |
| 43 | Six intertidal area and four urban drainage sites, Selangor, Malaysia | 6.64   | -1.69 | 0.46  | 2.32   | 3.04E-04 | 2.78E-08 | 3.09E-05 | 3.35E-04 | 2.27E-03 | 6.18E-08 | 1.21E-05 | 2.28E-03 | 43 |
| 44 | Yangtze River Estuary, China                                          | 11.70  | -0.87 | 0.82  | 4.09   | 5.36E-04 | 4.90E-08 | 5.45E-05 | 5.91E-04 | 4.00E-03 | 1.09E-07 | 2.13E-05 | 4.02E-03 | 44 |
| 45 | Yangtze River, China                                                  | 6.87   | -1.64 | 0.48  | 2.40   | 3.15E-04 | 2.88E-08 | 3.20E-05 | 3.47E-04 | 2.35E-03 | 6.39E-08 | 1.25E-05 | 2.36E-03 | 45 |
| 46 | Dumai coast, Indonesia                                                | 1.61   | -3.74 | 0.11  | 0.56   | 7.38E-05 | 6.74E-09 | 7.49E-06 | 8.13E-05 | 5.50E-04 | 1.50E-08 | 2.93E-06 | 5.53E-04 | 46 |
| 47 | Sri Serdang Industrial Area, Malaysia                                 | 21.70  | 0.02  | 1.52  | 7.59   | 9.95E-04 | 9.09E-08 | 1.01E-04 | 1.10E-03 | 7.42E-03 | 2.02E-07 | 3.96E-05 | 7.46E-03 | 47 |
| 48 | Laguna Lake, Philippines                                              | 9.70   | -1.14 | 0.68  | 3.39   | 4.45E-04 | 4.06E-08 | 4.51E-05 | 4.90E-04 | 3.32E-03 | 9.02E-08 | 1.77E-05 | 3.33E-03 | 48 |
| 49 | Northwestern part of Peninsular Malaysia                              | 4.79   | -2.16 | 0.33  | 1.67   | 2.20E-04 | 2.01E-08 | 2.23E-05 | 2.42E-04 | 1.64E-03 | 4.46E-08 | 8.73E-06 | 1.65E-03 | 49 |
| 50 | Urban river Suzhou City, China                                        | 41.00  | 0.93  | 2.87  | 14.34  | 1.88E-03 | 1.72E-07 | 1.91E-04 | 2.07E-03 | 1.40E-02 | 3.81E-07 | 7.47E-05 | 1.41E-02 | 50 |
| 51 | Kebir Rhumel Basin, Algeria                                           | 9.00   | -1.25 | 0.63  | 3.15   | 4.13E-04 | 3.77E-08 | 4.19E-05 | 4.55E-04 | 3.08E-03 | 8.37E-08 | 1.64E-05 | 3.09E-03 | 51 |
| 52 | Beysehir Lake, Turkey                                                 | 24.00  | 0.16  | 1.68  | 8.39   | 1.10E-03 | 1.01E-07 | 1.12E-04 | 1.21E-03 | 8.20E-03 | 2.23E-07 | 4.37E-05 | 8.25E-03 | 52 |
| 53 | West Port, Malaysia                                                   | 7.40   | -1.54 | 0.52  | 2.59   | 3.39E-04 | 3.10E-08 | 3.44E-05 | 3.74E-04 | 2.53E-03 | 6.88E-08 | 1.35E-05 | 2.54E-03 | 53 |
| 54 | Perlis River, Malaysia                                                | 7.31   | -1.55 | 0.51  | 2.56   | 3.35E-04 | 3.06E-08 | 3.40E-05 | 3.69E-04 | 2.50E-03 | 6.80E-08 | 1.33E-05 | 2.51E-03 | 54 |
| 55 | West coast of Peninsular Malaysia                                     | 5.59   | -1.94 | 0.39  | 1.95   | 2.56E-04 | 2.34E-08 | 2.60E-05 | 2.82E-04 | 1.91E-03 | 5.20E-08 | 1.02E-05 | 1.92E-03 | 55 |
| 56 | Hugli River Estuary and Sundarban Mangrove Wetland, India             | 11.60  | -0.89 | 0.81  | 4.06   | 5.32E-04 | 4.86E-08 | 5.40E-05 | 5.86E-04 | 3.96E-03 | 1.08E-07 | 2.11E-05 | 3.99E-03 | 56 |
| 57 | Lake Pamvotis, Greece                                                 | 15.00  | -0.52 | 1.05  | 5.24   | 6.88E-04 | 6.28E-08 | 6.98E-05 | 7.58E-04 | 5.13E-03 | 1.40E-07 | 2.73E-05 | 5.15E-03 | 57 |
| 58 | Sundarban, India and Bangladesh                                       | 36.00  | 0.75  | 2.52  | 12.59  | 1.65E-03 | 1.51E-07 | 1.68E-04 | 1.82E-03 | 1.23E-02 | 3.35E-07 | 6.56E-05 | 1.24E-02 | 58 |
| 59 | Shuangtaizi Estuary, China                                            | 1.80   | -3.57 | 0.13  | 0.63   | 8.25E-05 | 7.54E-09 | 8.38E-06 | 9.09E-05 | 6.15E-04 | 1.67E-08 | 3.28E-06 | 6.18E-04 | 59 |
| 60 | Old Yellow River Estuary, China                                       | 18.30  | -0.23 | 1.28  | 6.40   | 8.39E-04 | 7.66E-08 | 8.52E-05 | 9.24E-04 | 6.25E-03 | 1.70E-07 | 3.34E-05 | 6.29E-03 | 60 |
| 61 | Libyan Mediterranean coast                                            | 9.10   | -1.24 | 0.64  | 3.18   | 4.17E-04 | 3.81E-08 | 4.24E-05 | 4.60E-04 | 3.11E-03 | 8.47E-08 | 1.66E-05 | 3.13E-03 | 61 |

|    |                                             |       |       |      |       |          |          |          |          |          |          |          |          |    |
|----|---------------------------------------------|-------|-------|------|-------|----------|----------|----------|----------|----------|----------|----------|----------|----|
| 62 | Qinghai section of the Yellow River, China. | 11.80 | -0.86 | 0.83 | 4.13  | 5.41E-04 | 4.94E-08 | 5.49E-05 | 5.96E-04 | 4.03E-03 | 1.10E-07 | 2.15E-05 | 4.05E-03 | 62 |
| 63 | Serbia                                      | 11.50 | -0.90 | 0.80 | 4.02  | 5.27E-04 | 4.82E-08 | 5.35E-05 | 5.81E-04 | 3.93E-03 | 1.07E-07 | 2.10E-05 | 3.95E-03 | 63 |
| 64 | Laizhou Bay, China                          | 7.57  | -1.50 | 0.53 | 2.65  | 3.47E-04 | 3.17E-08 | 3.52E-05 | 3.82E-04 | 2.59E-03 | 7.04E-08 | 1.38E-05 | 2.60E-03 | 64 |
| 65 | Xiangjiang River and Dongting Lake, China   | 29.00 | 0.44  | 2.03 | 10.14 | 1.33E-03 | 1.21E-07 | 1.35E-04 | 1.46E-03 | 9.91E-03 | 2.70E-07 | 5.29E-05 | 9.96E-03 | 65 |
| 66 | Gulf of Thailand                            | 6.00  | -1.84 | 0.42 | 2.10  | 2.75E-04 | 2.51E-08 | 2.79E-05 | 3.03E-04 | 2.05E-03 | 5.58E-08 | 1.09E-05 | 2.06E-03 | 66 |
| 67 | Leizhou Peninsula, China                    | 3.37  | -2.67 | 0.24 | 1.18  | 1.55E-04 | 1.41E-08 | 1.57E-05 | 1.70E-04 | 1.15E-03 | 3.14E-08 | 6.14E-06 | 1.16E-03 | 67 |
| 68 | Gulf of Guinea                              | 0.20  | -6.74 | 0.01 | 0.07  | 9.17E-06 | 8.38E-10 | 9.31E-07 | 1.01E-05 | 6.84E-05 | 1.86E-09 | 3.65E-07 | 6.87E-05 | 68 |
| 69 | Nador lagoon, Morocco                       | 10.20 | -1.07 | 0.71 | 3.57  | 4.68E-04 | 4.27E-08 | 4.75E-05 | 5.15E-04 | 3.49E-03 | 9.49E-08 | 1.86E-05 | 3.50E-03 | 69 |
| 70 | Changshou Lake, China.                      | 21.20 | -0.02 | 1.48 | 7.41  | 9.72E-04 | 8.88E-08 | 9.87E-05 | 1.07E-03 | 7.25E-03 | 1.97E-07 | 3.86E-05 | 7.28E-03 | 70 |
| 71 | Gansu section of Yellow River, China        | 15.50 | -0.47 | 1.08 | 5.42  | 7.11E-04 | 6.49E-08 | 7.21E-05 | 7.83E-04 | 5.30E-03 | 1.44E-07 | 2.83E-05 | 5.33E-03 | 71 |
| 72 | Yinchuan section of Yellow River, China     | 18.80 | -0.19 | 1.31 | 6.57  | 8.62E-04 | 7.87E-08 | 8.75E-05 | 9.50E-04 | 6.43E-03 | 1.75E-07 | 3.43E-05 | 6.46E-03 | 72 |
| 73 | Kaohsiung Harbor, Taiwan.                   | 16.00 | -0.42 | 1.12 | 5.59  | 7.34E-04 | 6.70E-08 | 7.45E-05 | 8.08E-04 | 5.47E-03 | 1.49E-07 | 2.92E-05 | 5.50E-03 | 73 |
| 74 | Minjiang River, China                       | 2.45  | -3.13 | 0.17 | 0.86  | 1.12E-04 | 1.03E-08 | 1.14E-05 | 1.24E-04 | 8.37E-04 | 2.28E-08 | 4.47E-06 | 8.42E-04 | 74 |
| 75 | Shima River, China.                         | 10.80 | -0.99 | 0.76 | 3.78  | 4.95E-04 | 4.52E-08 | 5.03E-05 | 5.46E-04 | 3.69E-03 | 1.00E-07 | 1.97E-05 | 3.71E-03 | 75 |
| 76 | Coast of Ain Temouchent, Algeria            | 12.50 | -0.78 | 0.87 | 4.37  | 5.73E-04 | 5.24E-08 | 5.82E-05 | 6.31E-04 | 4.27E-03 | 1.16E-07 | 2.28E-05 | 4.29E-03 | 76 |
| 77 | Mangrove area of Shenzhen, China            | 50.00 | 1.22  | 3.50 | 17.48 | 2.29E-03 | 2.09E-07 | 2.33E-04 | 2.53E-03 | 1.71E-02 | 4.65E-07 | 9.11E-05 | 1.72E-02 | 77 |
| 78 | Trabzon Harbor, Turkey                      | 54.30 | 1.34  | 3.80 | 18.99 | 2.49E-03 | 2.27E-07 | 2.53E-04 | 2.74E-03 | 1.86E-02 | 5.05E-07 | 9.90E-05 | 1.87E-02 | 78 |
| 79 | Northern South China Sea, China             | 7.10  | -1.60 | 0.50 | 2.48  | 3.26E-04 | 2.97E-08 | 3.30E-05 | 3.59E-04 | 2.43E-03 | 6.61E-08 | 1.29E-05 | 2.44E-03 | 79 |
| 80 | Huaihe River Basin, China                   | 19.60 | -0.13 | 1.37 | 6.85  | 8.99E-04 | 8.21E-08 | 9.12E-05 | 9.90E-04 | 6.70E-03 | 1.82E-07 | 3.57E-05 | 6.73E-03 | 80 |
| 81 | West Guangdong coast, China                 | 11.50 | -0.90 | 0.80 | 4.02  | 5.27E-04 | 4.82E-08 | 5.35E-05 | 5.81E-04 | 3.93E-03 | 1.07E-07 | 2.10E-05 | 3.95E-03 | 81 |
| 82 | Southern coast of Sfax, Tunisia             | 8.23  | -1.38 | 0.58 | 2.88  | 3.77E-04 | 3.45E-08 | 3.83E-05 | 4.16E-04 | 2.81E-03 | 7.66E-08 | 1.50E-05 | 2.83E-03 | 82 |
| 83 | Haihe River Basin, China                    | 6.47  | -1.73 | 0.45 | 2.26  | 2.97E-04 | 2.71E-08 | 3.01E-05 | 3.27E-04 | 2.21E-03 | 6.02E-08 | 1.18E-05 | 2.22E-03 | 83 |
| 84 | Brisbane River, Australia                   | 20.00 | -0.10 | 1.40 | 6.99  | 9.17E-04 | 8.38E-08 | 9.31E-05 | 1.01E-03 | 6.84E-03 | 1.86E-07 | 3.65E-05 | 6.87E-03 | 84 |
| 85 | Chabahar Bay, Oman                          | 5.00  | -2.10 | 0.35 | 1.75  | 2.29E-04 | 2.09E-08 | 2.33E-05 | 2.53E-04 | 1.71E-03 | 4.65E-08 | 9.11E-06 | 1.72E-03 | 85 |

|     |                                                       |       |       |      |       |          |          |          |          |          |          |          |          |     |
|-----|-------------------------------------------------------|-------|-------|------|-------|----------|----------|----------|----------|----------|----------|----------|----------|-----|
| 86  | Gabes Gulf, Tunisia                                   | 0.59  | -5.18 | 0.04 | 0.21  | 2.71E-05 | 2.47E-09 | 2.75E-06 | 2.98E-05 | 2.02E-04 | 5.49E-09 | 1.08E-06 | 2.03E-04 | 86  |
| 87  | Chenab River, Pakistan                                | 6.00  | -1.84 | 0.42 | 2.10  | 2.75E-04 | 2.51E-08 | 2.79E-05 | 3.03E-04 | 2.05E-03 | 5.58E-08 | 1.09E-05 | 2.06E-03 | 87  |
| 88  | Zhangjiangkou Mangrove National Nature Reserve, China | 10.80 | -0.99 | 0.76 | 3.78  | 4.95E-04 | 4.52E-08 | 5.03E-05 | 5.46E-04 | 3.69E-03 | 1.00E-07 | 1.97E-05 | 3.71E-03 | 88  |
| 89  | Three Gorges Reservoir area, China                    | 46.50 | 1.12  | 3.25 | 16.26 | 2.13E-03 | 1.95E-07 | 2.16E-04 | 2.35E-03 | 1.59E-02 | 4.33E-07 | 8.48E-05 | 1.60E-02 | 89  |
| 90  | Gorgan Bay, Iran                                      | 8.10  | -1.40 | 0.57 | 2.83  | 3.71E-04 | 3.39E-08 | 3.77E-05 | 4.09E-04 | 2.77E-03 | 7.54E-08 | 1.48E-05 | 2.78E-03 | 90  |
| 91  | Tongi Canal, Bangladesh                               | 18.30 | -0.23 | 1.28 | 6.40  | 8.39E-04 | 7.66E-08 | 8.52E-05 | 9.24E-04 | 6.25E-03 | 1.70E-07 | 3.34E-05 | 6.29E-03 | 91  |
| 92  | Liaohu Estuary, China                                 | 1.70  | -3.66 | 0.12 | 0.59  | 7.80E-05 | 7.12E-09 | 7.91E-06 | 8.59E-05 | 5.81E-04 | 1.58E-08 | 3.10E-06 | 5.84E-04 | 92  |
| 93  | Xiangjiang River, China                               | 9.56  | -1.17 | 0.67 | 3.34  | 4.38E-04 | 4.00E-08 | 4.45E-05 | 4.83E-04 | 3.27E-03 | 8.89E-08 | 1.74E-05 | 3.28E-03 | 93  |
| 94  | Jiaozhou Bay, China                                   | 4.50  | -2.25 | 0.31 | 1.57  | 2.06E-04 | 1.88E-08 | 2.09E-05 | 2.27E-04 | 1.54E-03 | 4.19E-08 | 8.20E-06 | 1.55E-03 | 94  |
| 95  | Rivers near Kinshasa, DR Congo                        | 18.20 | -0.24 | 1.27 | 6.36  | 8.35E-04 | 7.62E-08 | 8.47E-05 | 9.19E-04 | 6.22E-03 | 1.69E-07 | 3.32E-05 | 6.25E-03 | 95  |
| 96  | Bayan Lepas, Malaysia                                 | 1.92  | -3.48 | 0.13 | 0.67  | 8.80E-05 | 8.04E-09 | 8.94E-06 | 9.70E-05 | 6.56E-04 | 1.79E-08 | 3.50E-06 | 6.60E-04 | 96  |
| 97  | Dakar coast and Saint Louis Estuary, Senegal          | 12.90 | -0.73 | 0.90 | 4.51  | 5.92E-04 | 5.40E-08 | 6.00E-05 | 6.52E-04 | 4.41E-03 | 1.20E-07 | 2.35E-05 | 4.43E-03 | 97  |
| 98  | Ennore to Poomphar, India                             | 1.35  | -3.99 | 0.09 | 0.47  | 6.19E-05 | 5.65E-09 | 6.28E-06 | 6.82E-05 | 4.61E-04 | 1.26E-08 | 2.46E-06 | 4.64E-04 | 98  |
| 99  | Mand River Delta, Iran                                | 25.00 | 0.22  | 1.75 | 8.74  | 1.15E-03 | 1.05E-07 | 1.16E-04 | 1.26E-03 | 8.54E-03 | 2.33E-07 | 4.56E-05 | 8.59E-03 | 99  |
| 100 | Pengerang, Malaysia                                   | 1.90  | -3.50 | 0.13 | 0.66  | 8.71E-05 | 7.96E-09 | 8.84E-06 | 9.60E-05 | 6.49E-04 | 1.77E-08 | 3.46E-06 | 6.53E-04 | 100 |
| 101 | Gorgan Bay, Iran                                      | 8.00  | -1.42 | 0.56 | 2.80  | 3.67E-04 | 3.35E-08 | 3.72E-05 | 4.04E-04 | 2.73E-03 | 7.44E-08 | 1.46E-05 | 2.75E-03 | 101 |
| 102 | Hongfeng Lake, China                                  | 23.20 | 0.11  | 1.62 | 8.11  | 1.06E-03 | 9.72E-08 | 1.08E-04 | 1.17E-03 | 7.93E-03 | 2.16E-07 | 4.23E-05 | 7.97E-03 | 102 |
| 103 | Korotoa River, Bangladesh                             | 0.43  | -5.64 | 0.03 | 0.15  | 1.97E-05 | 1.80E-09 | 2.00E-06 | 2.17E-05 | 1.47E-04 | 4.00E-09 | 7.84E-07 | 1.48E-04 | 103 |
| 104 | Benin River, Nigeria                                  | 6.88  | -1.64 | 0.48 | 2.41  | 3.15E-04 | 2.88E-08 | 3.20E-05 | 3.48E-04 | 2.35E-03 | 6.40E-08 | 1.25E-05 | 2.36E-03 | 104 |
| 105 | Namal Lake, Pakistan                                  | 18.50 | -0.21 | 1.29 | 6.47  | 8.48E-04 | 7.75E-08 | 8.61E-05 | 9.34E-04 | 6.32E-03 | 1.72E-07 | 3.37E-05 | 6.36E-03 | 105 |
| 106 | Rupsa River, Bangladesh                               | 18.66 | -0.20 | 1.30 | 6.52  | 8.56E-04 | 7.82E-08 | 8.68E-05 | 9.43E-04 | 6.38E-03 | 1.74E-07 | 3.40E-05 | 6.41E-03 | 106 |
| 107 | Louhajang River, Bangladesh                           | 9.85  | -1.12 | 0.69 | 3.44  | 4.52E-04 | 4.13E-08 | 4.58E-05 | 4.98E-04 | 3.37E-03 | 9.17E-08 | 1.80E-05 | 3.38E-03 | 107 |
| 108 | Korbevačka River, Serbia                              | 48.90 | 1.19  | 3.42 | 17.10 | 2.24E-03 | 2.05E-07 | 2.28E-04 | 2.47E-03 | 1.67E-02 | 4.55E-07 | 8.91E-05 | 1.68E-02 | 108 |
| 109 | Ganga River, India                                    | 2.10  | -3.35 | 0.15 | 0.73  | 9.63E-05 | 8.80E-09 | 9.77E-06 | 1.06E-04 | 7.18E-04 | 1.95E-08 | 3.83E-06 | 7.22E-04 | 109 |
| 110 | Poyang Lake, China                                    | 28.10 | 0.39  | 1.97 | 9.83  | 1.29E-03 | 1.18E-07 | 1.31E-04 | 1.42E-03 | 9.60E-03 | 2.61E-07 | 5.12E-05 | 9.65E-03 | 110 |
| 111 | Lake Qaroun, Egypt                                    | 1.47  | -3.87 | 0.10 | 0.51  | 6.74E-05 | 6.16E-09 | 6.84E-06 | 7.43E-05 | 5.02E-04 | 1.37E-08 | 2.68E-06 | 5.05E-04 | 111 |

|     |                               |       |       |      |       |          |          |          |          |          |          |          |          |     |
|-----|-------------------------------|-------|-------|------|-------|----------|----------|----------|----------|----------|----------|----------|----------|-----|
| 112 | Huixian Karst wetland, China  | 19.50 | -0.14 | 1.36 | 6.82  | 8.94E-04 | 8.17E-08 | 9.08E-05 | 9.85E-04 | 6.66E-03 | 1.81E-07 | 3.55E-05 | 6.70E-03 | 112 |
| 113 | River Atuwara, Nigeria        | 34.16 | 0.67  | 2.39 | 11.94 | 1.57E-03 | 1.43E-07 | 1.59E-04 | 1.73E-03 | 1.17E-02 | 3.18E-07 | 6.23E-05 | 1.17E-02 | 113 |
| 114 | Baiyangdian Lake, North China | 20.16 | -0.09 | 1.41 | 7.05  | 9.24E-04 | 8.44E-08 | 9.38E-05 | 1.02E-03 | 6.89E-03 | 1.88E-07 | 3.67E-05 | 6.93E-03 | 114 |
| 115 | Lake Bafa, Turkey             | 9.40  | -1.19 | 0.66 | 3.29  | 4.31E-04 | 3.94E-08 | 4.37E-05 | 4.75E-04 | 3.21E-03 | 8.75E-08 | 1.71E-05 | 3.23E-03 | 115 |
| 116 | Varthur Lake, India           | 86.50 | 2.01  | 6.05 | 30.24 | 3.97E-03 | 3.62E-07 | 4.03E-04 | 4.37E-03 | 2.96E-02 | 8.05E-07 | 1.58E-04 | 2.97E-02 | 116 |
| 117 | Weihe River, China            | 18.23 | -0.23 | 1.27 | 6.37  | 8.36E-04 | 7.64E-08 | 8.48E-05 | 9.21E-04 | 6.23E-03 | 1.70E-07 | 3.32E-05 | 6.26E-03 | 117 |
| 118 | Çömlekci stream, Turkey       | 2.94  | -2.87 | 0.21 | 1.03  | 1.35E-04 | 1.23E-08 | 1.37E-05 | 1.49E-04 | 1.00E-03 | 2.74E-08 | 5.36E-06 | 1.01E-03 | 118 |
| 119 | Oman Sea                      | 1.44  | -3.90 | 0.10 | 0.50  | 6.60E-05 | 6.03E-09 | 6.70E-06 | 7.27E-05 | 4.92E-04 | 1.34E-08 | 2.62E-06 | 4.95E-04 | 119 |
| 120 | Nile River, Egypt             | 18.90 | -0.18 | 1.32 | 6.61  | 8.67E-04 | 7.92E-08 | 8.80E-05 | 9.55E-04 | 6.46E-03 | 1.76E-07 | 3.44E-05 | 6.49E-03 | 120 |
| 121 | Setiu wetland, Malaysia       | 0.77  | -4.80 | 0.05 | 0.27  | 3.53E-05 | 3.22E-09 | 3.58E-06 | 3.89E-05 | 2.63E-04 | 7.16E-09 | 1.40E-06 | 2.65E-04 | 121 |
| 122 | Chishui River Basin, China    | 5.12  | -2.07 | 0.36 | 1.79  | 2.35E-04 | 2.14E-08 | 2.38E-05 | 2.59E-04 | 1.75E-03 | 4.76E-08 | 9.33E-06 | 1.76E-03 | 122 |
| 123 | Olt River, Romania            | 0.12  | -7.48 | 0.01 | 0.04  | 5.50E-06 | 5.03E-10 | 5.58E-07 | 6.06E-06 | 4.10E-05 | 1.12E-09 | 2.19E-07 | 4.12E-05 | 123 |
| 124 | River Surma, Bangladesh       | 1.59  | -3.75 | 0.11 | 0.56  | 7.29E-05 | 6.66E-09 | 7.40E-06 | 8.03E-05 | 5.43E-04 | 1.48E-08 | 2.90E-06 | 5.46E-04 | 124 |
| 125 | lake Erhai, China             | 45.10 | 1.07  | 3.15 | 15.77 | 2.07E-03 | 1.89E-07 | 2.10E-04 | 2.28E-03 | 1.54E-02 | 4.20E-07 | 8.22E-05 | 1.55E-02 | 125 |

**Table S2.** The maximum range of Cu concentrations (mg/kg dry weight) in the sediments cited from 125 papers the literature published between 1980 and 2022, and their calculated values of geoaccumulation index (I<sub>geo</sub>), contamination factor (CF), ecological risk (ER), hazard quotient ingestion (HQ<sub>ing</sub>), hazard quotient inhalation (HQ<sub>inh</sub>), hazard quotient derma contact (HQ<sub>der</sub>), hazard index (HI) for adults and children based on the cited Cu data.

|   |                               |      |      |       |        | Adults            | Adults            | Adults            | Adults   | Children          | Children          | Children          | Children |           |
|---|-------------------------------|------|------|-------|--------|-------------------|-------------------|-------------------|----------|-------------------|-------------------|-------------------|----------|-----------|
|   |                               | Cu   | Igeo | CF    | ER     | HQ <sub>ing</sub> | HQ <sub>inh</sub> | HQ <sub>der</sub> | HI       | HQ <sub>ing</sub> | HQ <sub>inh</sub> | HQ <sub>der</sub> | HI       | Reference |
| 1 | Tolo Harbour, Hong Kong       | 231  | 3.43 | 16.15 | 80.77  | 1.06E-02          | 9.67E-07          | 1.08E-03          | 1.17E-02 | 7.89E-02          | 2.15E-06          | 4.21E-04          | 7.94E-02 | 1         |
| 2 | Belfast Lough, Ireland        | 420  | 4.29 | 29.37 | 146.85 | 1.93E-02          | 1.76E-06          | 1.95E-03          | 2.12E-02 | 1.44E-01          | 3.91E-06          | 7.66E-04          | 1.44E-01 | 2         |
| 3 | Chao Phraya Estuary, Thailand | 37.5 | 0.81 | 2.62  | 13.11  | 1.72E-03          | 1.57E-07          | 1.75E-04          | 1.89E-03 | 1.28E-02          | 3.49E-07          | 6.84E-05          | 1.29E-02 | 3         |
| 4 | Ganges Estuary, India         | 53   | 1.31 | 3.71  | 18.53  | 2.43E-03          | 2.22E-07          | 2.47E-04          | 2.68E-03 | 1.81E-02          | 4.93E-07          | 9.66E-05          | 1.82E-02 | 4         |
| 5 | Java Sea, Indonesia           | 54   | 1.33 | 3.78  | 18.88  | 2.48E-03          | 2.26E-07          | 2.51E-04          | 2.73E-03 | 1.85E-02          | 5.02E-07          | 9.84E-05          | 1.86E-02 | 5         |

|    |                                                           |      |       |        |         |          |          |          |          |          |          |          |          |    |
|----|-----------------------------------------------------------|------|-------|--------|---------|----------|----------|----------|----------|----------|----------|----------|----------|----|
| 6  | Fly River Delta, Papua New Guinea                         | 71   | 1.73  | 4.97   | 24.83   | 3.26E-03 | 2.97E-07 | 3.30E-04 | 3.59E-03 | 2.43E-02 | 6.61E-07 | 1.29E-04 | 2.44E-02 | 6  |
| 7  | Singapore River                                           | 80   | 1.90  | 5.59   | 27.97   | 3.67E-03 | 3.35E-07 | 3.72E-04 | 4.04E-03 | 2.73E-02 | 7.44E-07 | 1.46E-04 | 2.75E-02 | 7  |
| 8  | Tokyo Bay, Japan                                          | 79.8 | 1.90  | 5.58   | 27.90   | 3.66E-03 | 3.34E-07 | 3.71E-04 | 4.03E-03 | 2.73E-02 | 7.42E-07 | 1.45E-04 | 2.74E-02 | 8  |
| 9  | Bintulu coastal waters, Malaysia                          | 13   | -0.72 | 0.91   | 4.55    | 5.96E-04 | 5.44E-08 | 6.05E-05 | 6.57E-04 | 4.44E-03 | 1.21E-07 | 2.37E-05 | 4.47E-03 | 9  |
| 10 | Juru River, Malaysia                                      | 72   | 1.75  | 5.03   | 25.17   | 3.30E-03 | 3.02E-07 | 3.35E-04 | 3.64E-03 | 2.46E-02 | 6.70E-07 | 1.31E-04 | 2.47E-02 | 10 |
| 11 | Victoria Harbour, Hong Kong                               | 3790 | 7.47  | 265.03 | 1325.17 | 1.74E-01 | 1.59E-05 | 1.76E-02 | 1.91E-01 | 1.30E+00 | 3.53E-05 | 6.91E-03 | 1.30E+00 | 11 |
| 12 | Scheldt Estuarine, Netherlands                            | 2600 | 6.92  | 181.82 | 909.09  | 1.19E-01 | 1.09E-05 | 1.21E-02 | 1.31E-01 | 8.89E-01 | 2.42E-05 | 4.74E-03 | 8.93E-01 | 12 |
| 13 | Johore Straits, Malaysia                                  | 92.9 | 2.11  | 6.50   | 32.48   | 4.26E-03 | 3.89E-07 | 4.32E-04 | 4.69E-03 | 3.17E-02 | 8.64E-07 | 1.69E-04 | 3.19E-02 | 13 |
| 14 | Osaka Bay, Japan                                          | 35   | 0.71  | 2.45   | 12.24   | 1.60E-03 | 1.47E-07 | 1.63E-04 | 1.77E-03 | 1.20E-02 | 3.26E-07 | 6.38E-05 | 1.20E-02 | 14 |
| 15 | Izmir Bay, Turkey                                         | 79   | 1.88  | 5.52   | 27.62   | 3.62E-03 | 3.31E-07 | 3.68E-04 | 3.99E-03 | 2.70E-02 | 7.35E-07 | 1.44E-04 | 2.71E-02 | 15 |
| 16 | Offshore and intertidal west coast of Peninsular Malaysia | 315  | 3.88  | 22.03  | 110.14  | 1.44E-02 | 1.32E-06 | 1.47E-03 | 1.59E-02 | 1.08E-01 | 2.93E-06 | 5.74E-04 | 1.08E-01 | 16 |
| 17 | Pearl River Delta, China                                  | 140  | 2.71  | 9.79   | 48.95   | 6.42E-03 | 5.86E-07 | 6.52E-04 | 7.07E-03 | 4.78E-02 | 1.30E-06 | 2.55E-04 | 4.81E-02 | 17 |
| 18 | Coastal Alang-Sosiya, India                               | 313  | 3.87  | 21.89  | 109.44  | 1.44E-02 | 1.31E-06 | 1.46E-03 | 1.58E-02 | 1.07E-01 | 2.91E-06 | 5.71E-04 | 1.08E-01 | 18 |
| 19 | Semarang, Indonesia                                       | 72   | 1.75  | 5.03   | 25.17   | 3.30E-03 | 3.02E-07 | 3.35E-04 | 3.64E-03 | 2.46E-02 | 6.70E-07 | 1.31E-04 | 2.47E-02 | 19 |
| 20 | Kelana Jaya Lakes, Malaysia                               | 73.6 | 1.78  | 5.15   | 25.73   | 3.37E-03 | 3.08E-07 | 3.43E-04 | 3.72E-03 | 2.52E-02 | 6.85E-07 | 1.34E-04 | 2.53E-02 | 20 |
| 21 | South west coast, Spain                                   | 336  | 3.97  | 23.50  | 117.48  | 1.54E-02 | 1.41E-06 | 1.56E-03 | 1.70E-02 | 1.15E-01 | 3.13E-06 | 6.12E-04 | 1.15E-01 | 21 |
| 22 | Mangrove area, Singapore                                  | 32   | 0.58  | 2.24   | 11.19   | 1.47E-03 | 1.34E-07 | 1.49E-04 | 1.62E-03 | 1.09E-02 | 2.98E-07 | 5.83E-05 | 1.10E-02 | 22 |
| 23 | Ebrie Lagoon, Ivory Coast                                 | 86   | 2.00  | 6.01   | 30.07   | 3.94E-03 | 3.60E-07 | 4.00E-04 | 4.34E-03 | 2.94E-02 | 8.00E-07 | 1.57E-04 | 2.95E-02 | 23 |
| 24 | Western Moreton Bay, Australia                            | 31   | 0.53  | 2.17   | 10.84   | 1.42E-03 | 1.30E-07 | 1.44E-04 | 1.57E-03 | 1.06E-02 | 2.88E-07 | 5.65E-05 | 1.07E-02 | 24 |
| 25 | Balaton Lake, Hungary                                     | 36   | 0.75  | 2.52   | 12.59   | 1.65E-03 | 1.51E-07 | 1.68E-04 | 1.82E-03 | 1.23E-02 | 3.35E-07 | 6.56E-05 | 1.24E-02 | 25 |
| 26 | Mandovy Estuary, India                                    | 77.5 | 1.85  | 5.42   | 27.10   | 3.55E-03 | 3.25E-07 | 3.61E-04 | 3.91E-03 | 2.65E-02 | 7.21E-07 | 1.41E-04 | 2.66E-02 | 26 |
| 27 | Kranji and Tekong Island, Singapore                       | 17.9 | -0.26 | 1.25   | 6.26    | 8.21E-04 | 7.50E-08 | 8.33E-05 | 9.04E-04 | 6.12E-03 | 1.67E-07 | 3.26E-05 | 6.15E-03 | 27 |
| 28 | Izmit Bay, Turkey                                         | 139  | 2.70  | 9.72   | 48.60   | 6.37E-03 | 5.82E-07 | 6.47E-04 | 7.02E-03 | 4.75E-02 | 1.29E-06 | 2.53E-04 | 4.78E-02 | 28 |



|    |                                                                       |      |       |        |        |          |          |          |          |          |          |          |          |    |
|----|-----------------------------------------------------------------------|------|-------|--------|--------|----------|----------|----------|----------|----------|----------|----------|----------|----|
| 29 | Agbabu Bitumen Deposit Area, Nigeria                                  | 23.3 | 0.12  | 1.63   | 8.15   | 1.07E-03 | 9.76E-08 | 1.08E-04 | 1.18E-03 | 7.96E-03 | 2.17E-07 | 4.25E-05 | 8.01E-03 | 29 |
| 30 | Tg. Piai, Peninsular Malaysia                                         | 3.81 | -2.49 | 0.27   | 1.33   | 1.75E-04 | 1.60E-08 | 1.77E-05 | 1.92E-04 | 1.30E-03 | 3.54E-08 | 6.94E-06 | 1.31E-03 | 30 |
| 31 | Mvudi River, South Africa                                             | 1027 | 5.58  | 71.82  | 359.09 | 4.71E-02 | 4.30E-06 | 4.78E-03 | 5.19E-02 | 3.51E-01 | 9.56E-06 | 1.87E-03 | 3.53E-01 | 31 |
| 32 | Lakes of southwest Japan                                              | 44   | 1.04  | 3.08   | 15.38  | 2.02E-03 | 1.84E-07 | 2.05E-04 | 2.22E-03 | 1.50E-02 | 4.09E-07 | 8.02E-05 | 1.51E-02 | 32 |
| 33 | Kaoshiung Harbor, Taiwan                                              | 946  | 5.46  | 66.15  | 330.77 | 4.34E-02 | 3.96E-06 | 4.40E-03 | 4.78E-02 | 3.23E-01 | 8.80E-06 | 1.72E-03 | 3.25E-01 | 33 |
| 34 | Pearl River Estuary, China                                            | 351  | 4.03  | 24.55  | 122.73 | 1.61E-02 | 1.47E-06 | 1.63E-03 | 1.77E-02 | 1.20E-01 | 3.27E-06 | 6.40E-04 | 1.21E-01 | 34 |
| 35 | Western Xiamen Bay, China                                             | 97   | 2.18  | 6.78   | 33.92  | 4.45E-03 | 4.06E-07 | 4.51E-04 | 4.90E-03 | 3.32E-02 | 9.02E-07 | 1.77E-04 | 3.33E-02 | 35 |
| 36 | Sepang River, Malaysia                                                | 161  | 2.91  | 11.26  | 56.29  | 7.38E-03 | 6.74E-07 | 7.49E-04 | 8.13E-03 | 5.50E-02 | 1.50E-06 | 2.93E-04 | 5.53E-02 | 36 |
| 37 | Polluted drainage sediments from Peninsular Malaysia                  | 1019 | 5.57  | 71.26  | 356.29 | 4.67E-02 | 4.27E-06 | 4.74E-03 | 5.15E-02 | 3.48E-01 | 9.48E-06 | 1.86E-03 | 3.50E-01 | 37 |
| 38 | Victoria Harbour, Hong Kong                                           | 280  | 3.71  | 19.58  | 97.90  | 1.28E-02 | 1.17E-06 | 1.30E-03 | 1.41E-02 | 9.57E-02 | 2.61E-06 | 5.10E-04 | 9.62E-02 | 38 |
| 39 | Manchar Lake, Pakistan                                                | 29.7 | 0.47  | 2.08   | 10.38  | 1.36E-03 | 1.24E-07 | 1.38E-04 | 1.50E-03 | 1.02E-02 | 2.76E-07 | 5.41E-05 | 1.02E-02 | 39 |
| 40 | East, South and West coasts of Peninsular Malaysia                    | 38.8 | 0.86  | 2.71   | 13.57  | 1.78E-03 | 1.63E-07 | 1.81E-04 | 1.96E-03 | 1.33E-02 | 3.61E-07 | 7.07E-05 | 1.33E-02 | 40 |
| 41 | Old Nakagawa River, Japan                                             | 1565 | 6.19  | 109.44 | 547.20 | 7.18E-02 | 6.55E-06 | 7.28E-03 | 7.91E-02 | 5.35E-01 | 1.46E-05 | 2.85E-03 | 5.38E-01 | 41 |
| 42 | Southern part of Peninsular Malaysia                                  | 116  | 2.44  | 8.11   | 40.56  | 5.32E-03 | 4.86E-07 | 5.40E-04 | 5.86E-03 | 3.96E-02 | 1.08E-06 | 2.11E-04 | 3.99E-02 | 42 |
| 43 | Six intertidal area and four urban drainage sites, Selangor, Malaysia | 123  | 2.52  | 8.60   | 43.01  | 5.64E-03 | 5.15E-07 | 5.72E-04 | 6.21E-03 | 4.20E-02 | 1.14E-06 | 2.24E-04 | 4.23E-02 | 43 |
| 44 | Yangtze River Estuary, China                                          | 46.6 | 1.12  | 3.26   | 16.29  | 2.14E-03 | 1.95E-07 | 2.17E-04 | 2.35E-03 | 1.59E-02 | 4.34E-07 | 8.49E-05 | 1.60E-02 | 44 |
| 45 | Yangtze River, China                                                  | 49.7 | 1.21  | 3.48   | 17.38  | 2.28E-03 | 2.08E-07 | 2.31E-04 | 2.51E-03 | 1.70E-02 | 4.62E-07 | 9.06E-05 | 1.71E-02 | 45 |
| 46 | Dumai coast, Indonesia                                                | 13.8 | -0.64 | 0.97   | 4.83   | 6.33E-04 | 5.78E-08 | 6.42E-05 | 6.97E-04 | 4.72E-03 | 1.28E-07 | 2.52E-05 | 4.74E-03 | 46 |
| 47 | Sri Serdang Industrial Area, Malaysia                                 | 348  | 4.02  | 24.34  | 121.68 | 1.60E-02 | 1.46E-06 | 1.62E-03 | 1.76E-02 | 1.19E-01 | 3.24E-06 | 6.34E-04 | 1.20E-01 | 47 |
| 48 | Laguna Lake, Philippines                                              | 18.7 | -0.20 | 1.31   | 6.54   | 8.57E-04 | 7.83E-08 | 8.70E-05 | 9.45E-04 | 6.39E-03 | 1.74E-07 | 3.41E-05 | 6.43E-03 | 48 |

|    |                                                           |       |       |         |         |          |          |          |          |          |          |          |          |    |
|----|-----------------------------------------------------------|-------|-------|---------|---------|----------|----------|----------|----------|----------|----------|----------|----------|----|
| 49 | Northwestern part of Peninsular Malaysia                  | 119   | 2.47  | 8.32    | 41.61   | 5.46E-03 | 4.98E-07 | 5.54E-04 | 6.01E-03 | 4.07E-02 | 1.11E-06 | 2.17E-04 | 4.09E-02 | 49 |
| 50 | Urban river Suzhou City, China                            | 173   | 3.01  | 12.10   | 60.49   | 7.93E-03 | 7.25E-07 | 8.05E-04 | 8.74E-03 | 5.91E-02 | 1.61E-06 | 3.15E-04 | 5.94E-02 | 50 |
| 51 | Kebir Rhumel Basin, Algeria                               | 446   | 4.38  | 31.19   | 155.94  | 2.05E-02 | 1.87E-06 | 2.08E-03 | 2.25E-02 | 1.52E-01 | 4.15E-06 | 8.13E-04 | 1.53E-01 | 51 |
| 52 | Beysehir Lake, Turkey                                     | 90.3  | 2.07  | 6.31    | 31.57   | 4.14E-03 | 3.78E-07 | 4.20E-04 | 4.56E-03 | 3.09E-02 | 8.40E-07 | 1.65E-04 | 3.10E-02 | 52 |
| 53 | West Port, Malaysia                                       | 27.6  | 0.36  | 1.93    | 9.65    | 1.27E-03 | 1.16E-07 | 1.28E-04 | 1.39E-03 | 9.43E-03 | 2.57E-07 | 5.03E-05 | 9.48E-03 | 53 |
| 54 | Perlis River, Malaysia                                    | 35.9  | 0.74  | 2.51    | 12.55   | 1.65E-03 | 1.50E-07 | 1.67E-04 | 1.81E-03 | 1.23E-02 | 3.34E-07 | 6.54E-05 | 1.23E-02 | 54 |
| 55 | West coast of Peninsular Malaysia                         | 28.7  | 0.42  | 2.01    | 10.03   | 1.32E-03 | 1.20E-07 | 1.34E-04 | 1.45E-03 | 9.81E-03 | 2.67E-07 | 5.23E-05 | 9.86E-03 | 55 |
| 56 | Hugli River Estuary and Sundarban Mangrove Wetland, India | 102   | 2.25  | 7.13    | 35.66   | 4.68E-03 | 4.27E-07 | 4.75E-04 | 5.15E-03 | 3.49E-02 | 9.49E-07 | 1.86E-04 | 3.50E-02 | 56 |
| 57 | Lake Pamvotis, Greece                                     | 24985 | 10.19 | 1747.20 | 8736.01 | 1.15E+00 | 1.05E-04 | 1.16E-01 | 1.26E+00 | 8.54E+00 | 2.32E-04 | 4.55E-02 | 8.58E+00 | 57 |
| 58 | Sundarban, India and Bangladesh                           | 82    | 1.93  | 5.73    | 28.67   | 3.76E-03 | 3.43E-07 | 3.82E-04 | 4.14E-03 | 2.80E-02 | 7.63E-07 | 1.49E-04 | 2.82E-02 | 58 |
| 59 | Shuangtaizi Estuary, China                                | 17.7  | -0.28 | 1.24    | 6.19    | 8.12E-04 | 7.41E-08 | 8.24E-05 | 8.94E-04 | 6.05E-03 | 1.65E-07 | 3.23E-05 | 6.08E-03 | 59 |
| 60 | Old Yellow River Estuary, China                           | 38.5  | 0.84  | 2.69    | 13.46   | 1.77E-03 | 1.61E-07 | 1.79E-04 | 1.94E-03 | 1.32E-02 | 3.58E-07 | 7.02E-05 | 1.32E-02 | 60 |
| 61 | Libyan Mediterranean coast                                | 22.7  | 0.08  | 1.59    | 7.94    | 1.04E-03 | 9.51E-08 | 1.06E-04 | 1.15E-03 | 7.76E-03 | 2.11E-07 | 4.14E-05 | 7.80E-03 | 61 |
| 62 | Qinghai section of the Yellow River, China.               | 57    | 1.41  | 3.99    | 19.93   | 2.61E-03 | 2.39E-07 | 2.65E-04 | 2.88E-03 | 1.95E-02 | 5.30E-07 | 1.04E-04 | 1.96E-02 | 62 |
| 63 | Serbia                                                    | 870   | 5.34  | 60.84   | 304.20  | 3.99E-02 | 3.64E-06 | 4.05E-03 | 4.39E-02 | 2.97E-01 | 8.09E-06 | 1.59E-03 | 2.99E-01 | 63 |
| 64 | Laizhou Bay, China                                        | 21.3  | -0.01 | 1.49    | 7.45    | 9.77E-04 | 8.92E-08 | 9.91E-05 | 1.08E-03 | 7.28E-03 | 1.98E-07 | 3.88E-05 | 7.32E-03 | 64 |
| 65 | Xiangjiang River and Dongting Lake, China                 | 217   | 3.34  | 15.17   | 75.87   | 9.95E-03 | 9.09E-07 | 1.01E-03 | 1.10E-02 | 7.42E-02 | 2.02E-06 | 3.96E-04 | 7.46E-02 | 65 |
| 66 | Gulf of Thailand                                          | 36    | 0.75  | 2.52    | 12.59   | 1.65E-03 | 1.51E-07 | 1.68E-04 | 1.82E-03 | 1.23E-02 | 3.35E-07 | 6.56E-05 | 1.24E-02 | 66 |
| 67 | Leizhou Peninsula, China                                  | 33.4  | 0.64  | 2.34    | 11.68   | 1.53E-03 | 1.40E-07 | 1.55E-04 | 1.69E-03 | 1.14E-02 | 3.11E-07 | 6.09E-05 | 1.15E-02 | 67 |
| 68 | Gulf of Guinea                                            | 29.3  | 0.45  | 2.05    | 10.24   | 1.34E-03 | 1.23E-07 | 1.36E-04 | 1.48E-03 | 1.00E-02 | 2.73E-07 | 5.34E-05 | 1.01E-02 | 68 |
| 69 | Nador lagoon, Morocco                                     | 398   | 4.21  | 27.83   | 139.16  | 1.82E-02 | 1.67E-06 | 1.85E-03 | 2.01E-02 | 1.36E-01 | 3.70E-06 | 7.25E-04 | 1.37E-01 | 69 |
| 70 | Changshou Lake, China.                                    | 74.9  | 1.80  | 5.24    | 26.19   | 3.43E-03 | 3.14E-07 | 3.49E-04 | 3.78E-03 | 2.56E-02 | 6.97E-07 | 1.37E-04 | 2.57E-02 | 70 |
| 71 | Gansu section of Yellow River, China                      | 57.5  | 1.42  | 4.02    | 20.10   | 2.64E-03 | 2.41E-07 | 2.68E-04 | 2.90E-03 | 1.97E-02 | 5.35E-07 | 1.05E-04 | 1.98E-02 | 71 |

|    |                                                       |      |       |       |        |          |          |          |          |          |          |          |          |    |
|----|-------------------------------------------------------|------|-------|-------|--------|----------|----------|----------|----------|----------|----------|----------|----------|----|
| 72 | Yinchuan section of Yellow River, China               | 28.9 | 0.43  | 2.02  | 10.10  | 1.33E-03 | 1.21E-07 | 1.35E-04 | 1.46E-03 | 9.88E-03 | 2.69E-07 | 5.27E-05 | 9.93E-03 | 72 |
| 73 | Kaohsiung Harbor, Taiwan.                             | 760  | 5.15  | 53.15 | 265.73 | 3.48E-02 | 3.18E-06 | 3.54E-03 | 3.84E-02 | 2.60E-01 | 7.07E-06 | 1.39E-03 | 2.61E-01 | 73 |
| 74 | Minjiang River, China                                 | 95.8 | 2.16  | 6.70  | 33.50  | 4.39E-03 | 4.01E-07 | 4.46E-04 | 4.84E-03 | 3.27E-02 | 8.91E-07 | 1.75E-04 | 3.29E-02 | 74 |
| 75 | Shima River, China.                                   | 630  | 4.88  | 44.06 | 220.28 | 2.89E-02 | 2.64E-06 | 2.93E-03 | 3.18E-02 | 2.15E-01 | 5.86E-06 | 1.15E-03 | 2.16E-01 | 75 |
| 76 | Coast of Ain Temouchent, Algeria                      | 31.2 | 0.54  | 2.18  | 10.91  | 1.43E-03 | 1.31E-07 | 1.45E-04 | 1.58E-03 | 1.07E-02 | 2.90E-07 | 5.69E-05 | 1.07E-02 | 76 |
| 77 | Mangrove area of Shenzhen, China                      | 75   | 1.81  | 5.24  | 26.22  | 3.44E-03 | 3.14E-07 | 3.49E-04 | 3.79E-03 | 2.56E-02 | 6.98E-07 | 1.37E-04 | 2.58E-02 | 77 |
| 78 | Trabzon Harbor, Turkey                                | 247  | 3.53  | 17.27 | 86.36  | 1.13E-02 | 1.03E-06 | 1.15E-03 | 1.25E-02 | 8.44E-02 | 2.30E-06 | 4.50E-04 | 8.49E-02 | 78 |
| 79 | Northern South China Sea, China                       | 38.1 | 0.83  | 2.66  | 13.32  | 1.75E-03 | 1.60E-07 | 1.77E-04 | 1.92E-03 | 1.30E-02 | 3.54E-07 | 6.94E-05 | 1.31E-02 | 79 |
| 80 | Huaihe River Basin, China                             | 35.9 | 0.74  | 2.51  | 12.55  | 1.65E-03 | 1.50E-07 | 1.67E-04 | 1.81E-03 | 1.23E-02 | 3.34E-07 | 6.54E-05 | 1.23E-02 | 80 |
| 81 | West Guangdong coast, China                           | 78.8 | 1.88  | 5.51  | 27.55  | 3.61E-03 | 3.30E-07 | 3.67E-04 | 3.98E-03 | 2.69E-02 | 7.33E-07 | 1.44E-04 | 2.71E-02 | 81 |
| 82 | Southern coast of Sfax, Tunisia                       | 28.6 | 0.42  | 2.00  | 10.00  | 1.31E-03 | 1.20E-07 | 1.33E-04 | 1.44E-03 | 9.77E-03 | 2.66E-07 | 5.21E-05 | 9.83E-03 | 82 |
| 83 | Haihe River Basin, China                              | 179  | 3.06  | 12.52 | 62.59  | 8.21E-03 | 7.50E-07 | 8.33E-04 | 9.04E-03 | 6.12E-02 | 1.67E-06 | 3.26E-04 | 6.15E-02 | 83 |
| 84 | Brisbane River, Australia                             | 110  | 2.36  | 7.69  | 38.46  | 5.04E-03 | 4.61E-07 | 5.12E-04 | 5.56E-03 | 3.76E-02 | 1.02E-06 | 2.00E-04 | 3.78E-02 | 84 |
| 85 | Chabahar Bay, Oman                                    | 26   | 0.28  | 1.82  | 9.09   | 1.19E-03 | 1.09E-07 | 1.21E-04 | 1.31E-03 | 8.89E-03 | 2.42E-07 | 4.74E-05 | 8.93E-03 | 85 |
| 86 | Gabes Gulf, Tunisia                                   | 5.8  | -1.89 | 0.41  | 2.03   | 2.66E-04 | 2.43E-08 | 2.70E-05 | 2.93E-04 | 1.98E-03 | 5.40E-08 | 1.06E-05 | 1.99E-03 | 86 |
| 87 | Chenab River, Pakistan                                | 8.7  | -1.30 | 0.61  | 3.04   | 3.99E-04 | 3.64E-08 | 4.05E-05 | 4.39E-04 | 2.97E-03 | 8.09E-08 | 1.59E-05 | 2.99E-03 | 87 |
| 88 | Zhangjiangkou Mangrove National Nature Reserve, China | 26.7 | 0.32  | 1.87  | 9.34   | 1.22E-03 | 1.12E-07 | 1.24E-04 | 1.35E-03 | 9.13E-03 | 2.48E-07 | 4.87E-05 | 9.17E-03 | 88 |
| 89 | Three Gorges Reservoir area, China                    | 85.7 | 2.00  | 5.99  | 29.97  | 3.93E-03 | 3.59E-07 | 3.99E-04 | 4.33E-03 | 2.93E-02 | 7.97E-07 | 1.56E-04 | 2.94E-02 | 89 |
| 90 | Gorgan Bay, Iran                                      | 12.4 | -0.79 | 0.87  | 4.34   | 5.69E-04 | 5.19E-08 | 5.77E-05 | 6.26E-04 | 4.24E-03 | 1.15E-07 | 2.26E-05 | 4.26E-03 | 90 |
| 91 | Tongi Canal, Bangladesh                               | 101  | 2.24  | 7.06  | 35.31  | 4.63E-03 | 4.23E-07 | 4.70E-04 | 5.10E-03 | 3.45E-02 | 9.40E-07 | 1.84E-04 | 3.47E-02 | 91 |
| 92 | Liaohe Estuary, China                                 | 47.9 | 1.16  | 3.35  | 16.75  | 2.20E-03 | 2.01E-07 | 2.23E-04 | 2.42E-03 | 1.64E-02 | 4.46E-07 | 8.73E-05 | 1.65E-02 | 92 |
| 93 | Xiangjiang River, China                               | 81.8 | 1.93  | 5.72  | 28.60  | 3.75E-03 | 3.43E-07 | 3.81E-04 | 4.13E-03 | 2.80E-02 | 7.61E-07 | 1.49E-04 | 2.81E-02 | 93 |
| 94 | Jiaozhou Bay, China                                   | 179  | 3.06  | 12.52 | 62.59  | 8.21E-03 | 7.50E-07 | 8.33E-04 | 9.04E-03 | 6.12E-02 | 1.67E-06 | 3.26E-04 | 6.15E-02 | 94 |
| 95 | Rivers near Kinshasa, DR Congo                        | 325  | 3.92  | 22.73 | 113.64 | 1.49E-02 | 1.36E-06 | 1.51E-03 | 1.64E-02 | 1.11E-01 | 3.02E-06 | 5.92E-04 | 1.12E-01 | 95 |

|     |                                              |       |       |       |        |          |          |          |          |          |          |          |          |     |
|-----|----------------------------------------------|-------|-------|-------|--------|----------|----------|----------|----------|----------|----------|----------|----------|-----|
| 96  | Bayan Lepas, Malaysia                        | 387   | 4.17  | 27.06 | 135.31 | 1.77E-02 | 1.62E-06 | 1.80E-03 | 1.95E-02 | 1.32E-01 | 3.60E-06 | 7.05E-04 | 1.33E-01 | 96  |
| 97  | Dakar coast and Saint Louis Estuary, Senegal | 121   | 2.50  | 8.46  | 42.31  | 5.55E-03 | 5.07E-07 | 5.63E-04 | 6.11E-03 | 4.14E-02 | 1.13E-06 | 2.21E-04 | 4.16E-02 | 97  |
| 98  | Ennore to Poomphar, India                    | 15.8  | -0.44 | 1.10  | 5.52   | 7.24E-04 | 6.62E-08 | 7.35E-05 | 7.98E-04 | 5.40E-03 | 1.47E-07 | 2.88E-05 | 5.43E-03 | 98  |
| 99  | Mand River Delta, Iran                       | 87    | 2.02  | 6.08  | 30.42  | 3.99E-03 | 3.64E-07 | 4.05E-04 | 4.39E-03 | 2.97E-02 | 8.09E-07 | 1.59E-04 | 2.99E-02 | 99  |
| 100 | Pengerang, Malaysia                          | 45.2  | 1.08  | 3.16  | 15.80  | 2.07E-03 | 1.89E-07 | 2.10E-04 | 2.28E-03 | 1.54E-02 | 4.21E-07 | 8.24E-05 | 1.55E-02 | 100 |
| 101 | Gorgan Bay, Iran                             | 22    | 0.04  | 1.54  | 7.69   | 1.01E-03 | 9.21E-08 | 1.02E-04 | 1.11E-03 | 7.52E-03 | 2.05E-07 | 4.01E-05 | 7.56E-03 | 101 |
| 102 | Hongfeng Lake, China                         | 73.8  | 1.78  | 5.16  | 25.80  | 3.38E-03 | 3.09E-07 | 3.43E-04 | 3.73E-03 | 2.52E-02 | 6.87E-07 | 1.35E-04 | 2.54E-02 | 102 |
| 103 | Korotoa River, Bangladesh                    | 4.309 | -2.32 | 0.30  | 1.51   | 1.98E-04 | 1.80E-08 | 2.01E-05 | 2.18E-04 | 1.47E-03 | 4.01E-08 | 7.85E-06 | 1.48E-03 | 103 |
| 104 | Benin River, Nigeria                         | 20.84 | -0.04 | 1.46  | 7.29   | 9.56E-04 | 8.73E-08 | 9.70E-05 | 1.05E-03 | 7.12E-03 | 1.94E-07 | 3.80E-05 | 7.16E-03 | 104 |
| 105 | Namal Lake, Pakistan                         | 46.7  | 1.12  | 3.27  | 16.33  | 2.14E-03 | 1.96E-07 | 2.17E-04 | 2.36E-03 | 1.60E-02 | 4.34E-07 | 8.51E-05 | 1.60E-02 | 105 |
| 106 | Rupsa River, Bangladesh                      | 82.08 | 1.94  | 5.74  | 28.70  | 3.76E-03 | 3.44E-07 | 3.82E-04 | 4.15E-03 | 2.81E-02 | 7.64E-07 | 1.50E-04 | 2.82E-02 | 106 |
| 107 | Louhajang River, Bangladesh                  | 30.27 | 0.50  | 2.12  | 10.58  | 1.39E-03 | 1.27E-07 | 1.41E-04 | 1.53E-03 | 1.03E-02 | 2.82E-07 | 5.52E-05 | 1.04E-02 | 107 |
| 108 | Korbevačka River, Serbia                     | 859.9 | 5.33  | 60.13 | 300.66 | 3.94E-02 | 3.60E-06 | 4.00E-03 | 4.34E-02 | 2.94E-01 | 8.00E-06 | 1.57E-03 | 2.95E-01 | 108 |
| 109 | Ganga River, India                           | 73.98 | 1.79  | 5.17  | 25.87  | 3.39E-03 | 3.10E-07 | 3.44E-04 | 3.74E-03 | 2.53E-02 | 6.88E-07 | 1.35E-04 | 2.54E-02 | 109 |
| 110 | Poyang Lake, China                           | 213   | 3.31  | 14.90 | 74.48  | 9.77E-03 | 8.92E-07 | 9.91E-04 | 1.08E-02 | 7.28E-02 | 1.98E-06 | 3.88E-04 | 7.32E-02 | 110 |
| 111 | Lake Qaroun, Egypt                           | 9.83  | -1.13 | 0.69  | 3.44   | 4.51E-04 | 4.12E-08 | 4.57E-05 | 4.97E-04 | 3.36E-03 | 9.15E-08 | 1.79E-05 | 3.38E-03 | 111 |
| 112 | Huixian Karst wetland, China                 | 53.63 | 1.32  | 3.75  | 18.75  | 2.46E-03 | 2.25E-07 | 2.50E-04 | 2.71E-03 | 1.83E-02 | 4.99E-07 | 9.78E-05 | 1.84E-02 | 112 |
| 113 | River Atuwara, Nigeria                       | 151.4 | 2.82  | 10.59 | 52.94  | 6.94E-03 | 6.34E-07 | 7.05E-04 | 7.65E-03 | 5.17E-02 | 1.41E-06 | 2.76E-04 | 5.20E-02 | 113 |
| 114 | Baiyangdian Lake, North China                | 63.35 | 1.56  | 4.43  | 22.15  | 2.90E-03 | 2.65E-07 | 2.95E-04 | 3.20E-03 | 2.17E-02 | 5.89E-07 | 1.15E-04 | 2.18E-02 | 114 |
| 115 | Lake Bafa, Turkey                            | 37    | 0.79  | 2.59  | 12.94  | 1.70E-03 | 1.55E-07 | 1.72E-04 | 1.87E-03 | 1.26E-02 | 3.44E-07 | 6.74E-05 | 1.27E-02 | 115 |
| 116 | Varthur Lake, India                          | 422   | 4.30  | 29.51 | 147.55 | 1.94E-02 | 1.77E-06 | 1.96E-03 | 2.13E-02 | 1.44E-01 | 3.93E-06 | 7.69E-04 | 1.45E-01 | 116 |
| 117 | Weihe River, China                           | 69.34 | 1.69  | 4.85  | 24.24  | 3.18E-03 | 2.90E-07 | 3.23E-04 | 3.50E-03 | 2.37E-02 | 6.45E-07 | 1.26E-04 | 2.38E-02 | 117 |
| 118 | Çömlekci stream, Turkey                      | 12.32 | -0.80 | 0.86  | 4.31   | 5.65E-04 | 5.16E-08 | 5.73E-05 | 6.22E-04 | 4.21E-03 | 1.15E-07 | 2.25E-05 | 4.23E-03 | 118 |
| 119 | Oman Sea                                     | 4.87  | -2.14 | 0.34  | 1.70   | 2.23E-04 | 2.04E-08 | 2.27E-05 | 2.46E-04 | 1.66E-03 | 4.53E-08 | 8.88E-06 | 1.67E-03 | 119 |
| 120 | Nile River, Egypt                            | 53.6  | 1.32  | 3.75  | 18.74  | 2.46E-03 | 2.24E-07 | 2.49E-04 | 2.71E-03 | 1.83E-02 | 4.99E-07 | 9.77E-05 | 1.84E-02 | 120 |
| 121 | Setiu wetland, Malaysia                      | 11.08 | -0.95 | 0.77  | 3.87   | 5.08E-04 | 4.64E-08 | 5.16E-05 | 5.60E-04 | 3.79E-03 | 1.03E-07 | 2.02E-05 | 3.81E-03 | 121 |

|     |                            |       |       |       |       |          |          |          |          |          |          |          |          |     |
|-----|----------------------------|-------|-------|-------|-------|----------|----------|----------|----------|----------|----------|----------|----------|-----|
| 122 | Chishui River Basin, China | 120.4 | 2.49  | 8.42  | 42.10 | 5.52E-03 | 5.04E-07 | 5.60E-04 | 6.08E-03 | 4.11E-02 | 1.12E-06 | 2.19E-04 | 4.14E-02 | 122 |
| 123 | Olt River, Romania         | 176   | 3.04  | 12.31 | 61.54 | 8.07E-03 | 7.37E-07 | 8.19E-04 | 8.89E-03 | 6.01E-02 | 1.64E-06 | 3.21E-04 | 6.05E-02 | 123 |
| 124 | River Surma, Bangladesh    | 8.52  | -1.33 | 0.60  | 2.98  | 3.91E-04 | 3.57E-08 | 3.97E-05 | 4.30E-04 | 2.91E-03 | 7.93E-08 | 1.55E-05 | 2.93E-03 | 124 |
| 125 | lake Erhai, China          | 87.6  | 2.03  | 6.13  | 30.63 | 4.02E-03 | 3.67E-07 | 4.08E-04 | 4.42E-03 | 2.99E-02 | 8.15E-07 | 1.60E-04 | 3.01E-02 | 125 |

## References

1. Wong, M.H., Ho, K.C., Kwok, T.K. Degree of pollution of several major streams entering Tolo Harbour, Hong Kong. *Mar. Pollut. Bull.* 1980, 11, 36–40.
2. Manga, N., Hanvey, W., Byers, W., Brown, J. Trace metal analysis of surficial sediments from Belfast Lough. *Irish Naturalists' J.* 1982, 20, 425–429.
3. Polprasert, C. Heavy metal pollution in the Chao Phraya River Estuary, Thailand. *Wat. Res.* 1982, 16, 775–784.
4. Subramanian, V., Jha, P. K., Van Grielen, R. Heavy metals in the Ganges Estuary. *Mar. Pollut. Bull.* 1988, 19, 290–293.
5. Everaarts, J. M. Heavy metals (Cu, Zn, Cd, Pb) in sediment of the Java Sea, estuarine and coastal areas of the East Java and some deep-sea areas. *Neth. J Sea Res.* 1989, 23, 403–413.
6. Baker, E., Harris, P. T. Copper, lead and zinc distribution in the sediments of the Fly River Delta and Torres Straits. *Mar. Pollut. Bull.* 1991, 22, 614–618.
7. Sin, Y.M., Wong, M.K., Chou, L.M., Normala, A.A study on heavy metal contents of the Singapore River. *Environ. Monitor. Assess.* 1991, 19, 481–94.
8. Fukushima, K., Saino, T., and Kodama, Y. Trace metal contamination in Tokyo Bay, Japan. *Sci. Tot. Environ.* 1992, 125, 373–389.
9. Ismail, A. Heavy metal concentration in sediment of Bintulu, Malaysia. *Mar. Pollut. Bull.* 1993, 26, 706–707.
10. Lim, P.E., Kiu, M.Y. Determination and speciation of heavy metals in sediments of the Juru River, Penang, Malaysia. *Environ. Monitor. Assess.* 1995, 35, 85–95.
11. Wong, Y.S., Tam, N.F.Y., Lau, P.S., Xue, X.Z. The toxicity of marine sediment in Victoria Harbour, Hong Kong. *Mar. Pollut. Bull.* 1995, 31, 464–470.
12. Zwolsman, J.J.G., Vaneck, G.T.M., Burger, G. Spatial and temporal distribution of trace metals in sediments from the Scheldt estuarine, south-west Netherlands. *Estuar. Coast. Shelf Sci.* 1996, 43, 55–79.
13. Wood, A.K., Ahmad, Z., Shazili, N.A., Yaakob, R., Carpenter, R. Geochemistry of sediments in Johore Strait between Malaysia and Singapore. *Continent. Shelf Res.* 1997, 10, 1207–1228.
14. Fukue, M., Nakamura, T., Kato, Y., Yamasaki, S. Degree of pollution for marine sediment. *Eng. Geol.* 1999, 53, 131–137.
15. Kucuksezgin, F. Distribution of trace metals in the surficial sediments of Izmir Bay (Turkey). *Toxicol. Environ. Chem.* 2001, 80, 203–207.
16. Yap, C.K., Ismail, A., Tan, S.G. Concentrations of Cu and Pb in the offshore and intertidal sediments of the west coast of Peninsular Malaysia. *Environ. Int.* 2002, 28, 467–479.
17. Cheung, K.C., Poon, B.H.T., Lan, C.Y., Wong, M.H. Assessment of metal and nutrient concentrations in river water and sediment collected from the cities in the Pearl River Delta. *South China. Chemosphere*, 2003, 52(9), 1431–1440.
18. Reddy, M.S., Basha, S., Kumar, V.G.S., Joshi, H.V., Ramachandraiah, G. Distribution, enrichment and accumulation of heavy metals in coastal sediments of Alang–Sosiya ship scrapping yard, India. *Mar. Pollut. Bull.* 2004, 48, 1055–1059.
19. Takarina, N.D., David, R.B., Micheal, J.R. Speciation of heavy metal in coastal sediments of Semarang, Indonesia. *Mar. Pollut. Bull.* 2004, 49, 854–874.

20. Ismail, A., Yap, C.K., Chan, F.F. Concentrations of Cd, Cu and Zn in sediments collected from urban lakes at Kelana Jaya, Peninsular Malaysia. *Wetland Sci.* 2004, 2(4), 248–258.
21. Morillo, J., Usero, J., Gracia, I. Heavy metal distribution in marine sediments from the southwest coast of Spain. *Chemosphere*, 2004, 55, 431–442.
22. Cuong, D. T., Bayen, S., Wurl, O., Subramanian, K., Wong, K.K.S., Sivasothi, N., Obbard, J.P. Heavy metal contamination in mangrove habitats of Singapore. *Mar. Pollut. Bull.* 2005, 50, 1713–1744.
23. Kouadio, I., Trefry, J.H. Sediment trace metal contamination in the Ivory Coast, West Africa. *Wat. Air Soil Pollut.* 1987, 32:145–154.
24. Cox, M.E., Preda, M., Trace metal distribution within marine and estuarine sediments of Western Moreton bay, Queensland, Australia: relation to land use and setting. *Geogr. Res.* 2005, 43(2), 173–193.
25. Nguyen, H.L., Leermakers, M., Osán, J., Török, S., Baeyens, W. Heavy metals in Lake Balaton: water column, suspended matter, sediment and biota. *Sci. Total Environ.* 2005, 340(1-3), 213-230
26. Alagarsamy, R. Distribution and seasonal variation of trace metals in surface sediments of the Mandovi estuary west coast of India. *Estuar. Coast. Shelf Sci.* 2006, 67, 333–339.
27. Cuong, D.T., Obbard, N. Metal speciation in coastal marine sediments from Singapore using a modified BCR sequential extraction procedure. *Appl. Geochem.* 2006, 21, 1335–1346.
28. Pekey, H. Heavy metal pollution assessment in sediments of Izmit Bay, Turkey. *Environ. Monitor. Assess.* 2006, 123, 219–231.
29. Olubunnmi, F.E., Olorunsola, O.E. Evaluation of the status of heavy metal pollution of sediment of Agbabu Bitumen Deposit Area, Nigeria. *European J. Sci Res.* 2010, 41(3), 373–382.
30. Yap, C.K., Choh, M.S., Edward, F.B., Ismail, A., Tan, S.G. Comparison of heavy metal concentrations in surface sediment of Tanjung Piai wetland with other sites receiving anthropogenic inputs along the southwestern coast of Peninsular Malaysia. *Wetland Sci.* 2006, 4(1), 48–57.
31. Edokpayi, J.N., Odiyo, J.O., Popoola, O.E., Msagati, T.A.M. Assessment of trace metals contamination of surface water and sediment: A case study of Mvudi River, South Africa. *Sustainability* 2016, 8, 135.
32. Bibi, M.H., Ahmed, F., Ishiga, H. Assessment of metal concentrations in lake sediments of southwest Japan based on sediment quality guidelines. *Environ. Geol.* 2007, 52(4), 625–639.
33. Chen, C.W., Kao, C.M., Chen, C.F., Dong, C.D. Distribution and accumulation of heavy metals in sediments of Kaoshiung Harbor, Taiwan. *Chemosphere* 2007, 66, 1431–1440.
34. Li, Q.S., Wu, Z.F., Chu, B., Zhang, N., Czi, S.S., Fang, J.H. Heavy metals in the coastal wetland sediments of the Pearl River Estuary, China. *Environ. Pollut.* 2007, 149, 158–164.
35. Zhang, L., Ye, X., Feng, H., Jing, Y., Ouyang, T., Yu, X., Liang, R., Gao, C., Chen, W. Heavy metal contamination in western Xiamen Bay sediments and its vicinity, China. *Mar. Pollut. Bull.* 2007, 54, 974–982.
36. Yap, C.K., Ismail, A., Low, C.H., Tan, S.G. Interpretation of Cu and Zn contamination in the aquatic environment of Peninsular Malaysia with special reference to a polluted river, Sepang River. *Wetland Sci.* 2007, 5(4), 311–321.
37. Yap, C.K., Pang, B.H., Fairuz, M.S., Hoo, Y.I., Tan, S.G. Heavy metal (Cd, Cu, Ni, Pb and Zn) pollution in surface sediments collected from drainages receiving different anthropogenic sources from Peninsular Malaysia. *Wetland Sci.* 2007, 5(2), 97–104.
38. Chloe, W.Y.T., Carman, C.I., Zhang, G., Paul, K.S.S., Qian, P., Xiang-dong, L. The spatial and temporal distribution of heavy metals in sediments of Victoria Harbour, Hong Kong. *Mar. Pollut. Bull.* 2008, 57, 816–825.
39. Arain, M.B., Kazi, T.G., Jamali, M.K., Jalbani, N., Afridi, H.I., Baig, J.A. Speciation of heavy metals in sediment by conventional, ultrasound and microwave assisted single extraction methods: a comparison with modified sequential extraction procedure. *J. Hazard Mater.* 2008, 154, 998–1006.
40. Yap, C.K., Cheng, W.H., Tan, S.G. Comparative studies of concentrations of Cu and Zn in the surface intertidal sediments collected from east, south and west coasts of Peninsular Malaysia. *Asian J. Wat. Environ. Pollut.* 2008, 5(2), 23–29.

41. Zakir, H. M., Shikazono, N., Otomo, K. Geochemical distribution of trace metals and assessment of anthropogenic pollution in sediments of Old Nakagawa River, Tokyo, Japan. *Am. J. Environ. Sci.* 2008, 4(6), 654–665.
42. Yap, C.K., Wong, C.H. Assessment Cu, Ni and Zn pollution in the surface sediments in the southern Peninsular Malaysia using cluster analysis, ratios of geochemical nonresistant to resistant fractions, and geochemical indices. *Environ. Asia* 2011, 4(1), 53–61.
43. Yap, C.K., Fairuz, M.S., Cheng, W.H. How elevated of Cd, Cu and Pb levels in the surface sediments collected from drainage receiving metal industrial effluents? Comparison with metal industrial drainage and intertidal sediments in Selangor, Malaysia. *Asian J. Microbiol. Biotech. Environ. Sci.* 2008, 10(2), 385–391.
44. An, Q., Wu, Y., Wang, J. Li, Z., Heavy metals and polychlorinated biphenyls in sediments of the Yangtze river estuary, China. *Environ. Earth Sci.* 2009, 59(2), 363–370.
45. Zhang, W., Feng, H., Chang, J., Qu, J., Xie, H., Yu, X. Heavy metal contamination in surface sediments of Yangtze River intertidal zone: An assessment from different indexes. *Environ. Pollut.* 2009, 157, 1533–1543.
46. Amin, B., Ismail, A., Arshad, A., Yap, C.K., Kamarudin, M.S. Anthropogenic impacts on heavy metal concentrations in the coastal sediments of Dumai, Indonesia. *Environ. Monitor. Assess.* 2009, 148 (1–4), 291–305.
47. Yap, C.K., Yazdani, M., Tan, S.G. The importance of the identification of point sources in a river receiving industrial metal effluents at the Serdang Industrial Area, Selangor. *J. Sus. Sci. Manage.* 2009, 4(2), 18–26.
48. Pradit, S., Wattayakorn, G., Angsupanich, S., Leemaker, M., Baeyens, W. Distribution of trace elements in sediments and biota of Songkhla Lake, southern Thailand. *Wat. Air Soil Pollut.* 2010, 206, 155–174.
49. Yap, C.K., Pang, B.H. Assessment of Cu, Pb and Zn contamination in sediment of north western Peninsular Malaysia by using sediment quality values and different geochemical indices. *Environ. Monitor. Assess.* 2011, 183(1–4), 23–39.
50. Mei, J., Li, Z., Sun, L., Gui, H., Wang, X. Assessment of heavy metals in the urban river sediments in Suzhou city, northern Anhui Province, China. *Procedia Environ. Sci.* 2011, 10, 547–2553.
51. Sahli, L., Afri-Mehennaoui, F.Z., El Okki, M. E.H., Blaise, C., Mehennaoui, S. Spatial and seasonal variations and ecotoxicological significance of sediment trace metal concentrations in Kebir–Rhumel basin (Northeast of Algeria). *Wat. Sci. Tech.* 2011, 64(8), 1759–1766.
52. Aktumsek, A., Gezgin, S. Seasonal variations of metal concentrations in muscle tissue of tench (*Tinca tinca*), water and sediment in Beysehir Lake (Turkey). *Environ. Tech.* 2011, 32(13), 1479–1485.
53. Sany, B.T., Sulaiman, A., Monazami, G., Salleh, A. Assessment of sediment quality according to heavy metal status in the West Port of Malaysia. *World Acad. Sci. Eng. Technol.* 2011, 74, 639–643.
54. Jamil, T., Lias, K., Hanif, H., Norsila, D., Aeisyah, A., Kamaruzzaman, B. The spatial variability of heavy metals concentrations and sedimentary organicmatter in estuary sediment of Sungai Perlis, Perlis, Malaysia. *Sci. Postprint* 2014, 1, e00016.
55. Cheng, W.H., Yap, C.K. Potential human health risks from toxic metals via mangrove snail consumption and their ecological risk assessments in the habitat sediment from Peninsular Malaysia. *Chemosphere* 2015, 135, 156–165.
56. Antizar-Ladislao, B., Mondal, P., Mitra, S., Sarkar, S.K. Assessment of trace metal contamination level and toxicity in sediments from coastal regions of West Bengal, eastern part of India. *Mar. Pollut. Bull.* 2015, 101(2), 886–894.
57. Ioannides, K., Stamoulis, K., Papachristodoulou, C., Tziamou, E., Markantonaki, C., Tsodoulos, I. Distribution of heavy metals in sediment cores of Lake Pamvotis (Greece): a pollution and potential risk assessment. *Environ. Monitor. Assess.* 2015, 187(1), 4209.
58. Kumar, A., Ramanathan, A.L. Speciation of selected trace metals (Fe, Mn, Cu and Zn) with depth in the sediments of Sundarban mangroves: India and Bangladesh. *J. Soils Sed.* 2015, 15(12), 2476–2486.
59. Li, C., Song, C., Yin, Y., Sun, M., Tao, P., Shao, M. Spatial distribution and risk assessment of heavy metals in sediments of Shuangtaizi estuary, China. *Mar. Pollut. Bull.* 2015, 98(1–2), 358–364.
60. Liu, H., Liu, G., Da, C., Yuan, Z., Wang, J. Concentration and fractionation of heavy metals in the old Yellow River Estuary, China. *J. Environ. Qual.* 2015, 44(1), 174–182.

61. Nasr, S. M., Okbah, M. A., El Haddad, H. S., and Soliman, N. F. Fractionation profile and mobility pattern of metals in sediments from the Mediterranean Coast, Libya. *Environ. Monitor. Assess.* 2015, 187(7), 8.
62. Ren, J., Shang, Z., Tao, L., Wang, X. Multivariate analysis and heavy metals pollution evaluation in Yellow river surface sediments. *Polish J. Environ. Stud.* 2015, 24(3), 1041–1048.
63. Sakan, S.M., Sakan, N.M., Dordevic, D.S. Pollution characteristics and potential ecological risk assessment of heavy metals in river sediments based on calculation of pollution indices. *Adv. Environ. Res.* 2015, 41:63–84.
64. Zhang, J., Gao, X. Heavy metals in surface sediments of the intertidal Laizhou Bay, Bohai Sea, China: Distributions, sources and contamination assessment. *Mar. Pollut. Bull.* 2015, 98(1–2), 320–327.
65. Zhang, G., Xie, Y., Mo, Y. Spatial distribution characteristics and potential ecological risk assessment of heavy metals in typical water surface sediments of Dongting Lake. *Res. Environ. Sci.* 2015, 28(10), 1545–1552.
66. Qiao, S., Shi, X., Fang, X., Liu, S., Kornkanitnan, N., Gao, J., Zhu, A., Hu, L., and Yu, Y. Heavy metal and clay mineral analyses in the sediments of Upper Gulf of Thailand and their implications on sedimentary provenance and dispersion pattern. *J. Asian Earth Sci.* 2015, 114, DOI:10.1016/j.jseaes.2015.04.043.
67. Liu, J., Ma, K., Qu, L. Ecological risk assessments and context–dependence analysis of heavy metal contamination in the sediments of mangrove swamp in Leizhou Peninsula, China. *Mar. Pollut. Bull.* 2015, 100, 224–230.
68. Mahu, E., Nyarko, E., Hulme, S., Coale, K.H. Distribution and enrichment of trace metals in marine sediments from the Eastern equatorial Atlantic, off the coast of Ghana in the Gulf of Guinea. *Mar. Pollut. Bull.* 2015, 98, 301–307.
69. Maanan, M., Saddik, M., Maanan, M., Chaibi, M., Assobhei, O., Zourarah, B. Environmental and ecological risk assessment of heavy metals in sediments of Nador lagoon, Morocco. *Ecol. Ind.* 2015, 48, 616–626.
70. Liang, A., Wang, Y., Guo, H., Bo, L., Zhang, S., Bai, Y. Assessment of pollution and identification of sources of heavy metals in the sediments of Changshou Lake in a branch of the Three Gorges Reservoir. *Environ. Sci. Pollut. Res.* 2015, 22(20), 16067–16076.
71. Shang, Z., Ren, J., Tao, L., Wang, X. Assessment of heavy metals in surface sediments from Gansu section of Yellow River, China. *Environ. Monitor. Assess.* 2015, 187(3), 79.
72. Shang, Z., Ren, J., Zhao, Y., Hao, J., Guo, Y. Distribution, fraction and pollution assessment of metals in surface sediments from Yinchuan section of Yellow River, China. *Fresenius Environ. Bull.* 2015, 24(12A):4485–4491.
73. Chen, C.F., Ju, Y.R., Chen, C.W., Dong, C.D. Vertical profile, contamination assessment, and source apportionment of heavy metals in sediment cores of Kaohsiung Harbor, Taiwan. *Chemosphere* 2016, 165, 67–79.
74. Fang, H., Chen, X., Zhang, X., Li, J., Yang, H. Heavy metal pollution in the surface sediments from Minjiang River (Fuzhou Section) and urban rivers. *Acta Sci. Circums.* 2016, 36(4), 1160–1168.
75. Gao, L., Wang, Z., Shan, J., Chen, J., Tang, C., Yi, M., Zhao, X. Distribution characteristics and sources of trace metals in sediment cores from a trans–boundary watercourse: An example from the Shima River, Pearl River Delta. *Ecotox. Environ. Saf.* 2016, 134, 186–195.
76. Kouidri, M., Dali youcef, N., Benabdellah, I., Ghoubali, R., Bernoussi, A., Lagha, A. Enrichment and geoaccumulation of heavy metals and risk assessment of sediments from coast of Ain Temouchent (Algeria). *Arabian J. Geosci.* 2016, 9(5), 354.
77. Li, R., Xu, H., Chai, M., Qiu, G.Y. Distribution and accumulation of mercury and copper in mangrove sediments in Shenzhen, the world’s most rapid urbanized city. *Environ. Monit. Assess.* 2016, 188(2), 1–11.
78. Ozseker, K., Seyhan, K., and Eruz, C. Ecological risk assessment and spatial distribution of heavy metals in sediment and pore water around Trabzon harbor, Turkey. *Fresenius Environ. Bull.* 2016, 25(8), 3125–3133.
79. Xu, F., Tian, X., Yin, F., Zhao, Y., Yin, X. Heavy metals in the surface sediments of the northern portion of the South China Sea shelf: distribution, contamination, and sources. *Environ. Sci. Pollut. Res.* 2016, 23(9), 8940–8950.



80. Yuan, H., An, S., Zhu, Z., Pan, W. Speciation and bioavailability of heavy metals in sediments taken from wetland in the Huaihe River Basin. *J. Environ. Eng. (US)* 2016, 142(9):C5015001.
81. Zhao, G., Lu, Q., Ye, S., Yuan, H., Ding, X., Wang, J. Assessment of heavy metal contamination in surface sediments of the west Guangdong coastal region, China. *Mar. Pollut. Bull.* 2016, 108(1–2), 268–274.
82. Zohra, B. S., Habib, A. Assessment of heavy metal contamination levels and toxicity in sediments and fishes from the Mediterranean Sea (southern coast of Sfax, Tunisia). *Environ. Sci. Pollut. Res.* 2016, 23(14):13954–13963.
83. Liu, J., Yang, T., Chen, Q., Liu, F., Wang, B. Distribution and potential ecological risk of heavy metals in the typical eco-units of Haihe River Basin. *Frontiers Environ. Sci. Eng.* 2016, 10(1):103–113.
84. Duodu, G.O., Goonetilleke, A., Ayoko, G.A. Comparison of pollution indices for the assessment of heavy metal in Brisbane River sediment. *Environ. Pollut.* 2016, 219, 1077–1091.
85. Agah, H., Saleh, A., Bastami, K.D., Fumani, N.S. Ecological risk, source and preliminary assessment of metals in the surface sediments of Chabahar Bay, Oman Sea. *Mar. Pollut. Bull.* 2016, 107, 383–388.
86. El Zrelli, R., Courjault–Radé, P., Rabaoui, L., Castet, S., Michel, S., and Bejaoui, N. Heavy metal contamination and ecological risk assessment in the surface sediments of the coastal area surrounding the industrial complex of Gabes city, Gulf of Gabes, SE Tunisia. *Mar. Pollut. Bull.* 2016, 101, 922–929.
87. Hanif, N., Shah Eqani, S.A.M.A., Ali, S.M., Cincinelli, A., Ali, N., Katsoyiannis, I.A., Tanveer, Z.A., Bokhari, H. Geo-accumulation and enrichment of trace metals in sediments and their associated risks in the Chenab River, Pakistan. *J. Geochem. Expl.* 2016, 165:62–70.
88. Wang, J., Du, H., Xu, Y., Chen, K., Liang, J., Ke, H., Cheng, S.Y., Liu, M., Deng, H., He, T., Wang, W., Cai, M. Environmental and ecological risk assessment of trace metal contamination in mangrove ecosystems: A case from Zhangjiangkou Mangrove National Nature Reserve, China. *BioMed Res. Int.* 2016, 2167053.
89. Zhuo, H.H., Sun, Z.W., Tan, L.Z., Wu, Y.L., Lan, J. Temporal and spatial variation characteristics of the heavy metals content in the surface sediment and the potential ecological risk trends in the Three Gorges Reservoir area. *Environ. Sci.* 2016, 37(12), 4633–4643.
90. Ghorbanzadeh, Z.S. Gh., Machinchian, M.A., Mousavi, N.R., Sari, A.R., Fatemi, S.M.R. Distribution pattern of heavy metals in the surficial sediment of Gorgan Bay (South Caspian Sea, Iran). *Iranian J. Fish. Sci.* 2016, 15(3), 1144–1166.
91. Hossen, M.Z., Islam, M.M., Hossain, M.S. Heavy Metal Contents in Sediments of an Urban Industrialized Area—A Case Study of Tongi Canal, Bangladesh. *Asian J. Wat. Environ. Pollut.* 2017, 14(1), 59–68.
92. Li, H., Ye, S., Ye, J., Fan, J., Gao, M., Guo, H. Baseline survey of sediments and marine organisms in Liaohe Estuary: Heavy metals, polychlorinated biphenyls and organochlorine pesticides. *Mar. Pollut. Bull.* 2017, 114, 555–563.
93. Liu, J., Xu, Y., Cheng, Y., Zhao, Y., Pan, Y., Fu, G., Dai, Y. Occurrence and risk assessment of heavy metals in sediments of the Xiangjiang River, China. *Environ. Sci. Pollut. Res.* 2017, 24(3), 2711–2723.
94. Xu, F., Liu, Z., Cao, Y., Qiu, L., Feng, J., Xu, F., Tian, X. Assessment of heavy metal contamination in urban river sediments in the Jiaozhou Bay catchment, Qingdao, China. *Catena* 2017, 150, 9–16.
95. Kilunga, P.I., Sivalingam, P., Laffite, A., Grandjean, D., Mulaji, C. K., de Alencastro, L.F., Mpiana, P.T., Pot, J. Accumulation of toxic metals and organic micro-pollutants in sediments from tropical urban rivers, Kinshasa, Democratic Republic of the Congo. *Chemosphere* 2017, 179, 37–48.
96. Khodami, S., Surif, M., Wan Maznah, W.O., Daryanabard, R. Assessment of heavy metal pollution in surface sediments of the Bayan Lepas area, Penang, Malaysia. *Mar. Pollut. Bull.* 2017, 114, 615–622.
97. Diop, C., Dewaele, D., Cazier, F., Diouf, A., Ouddane, B. Assessment of trace metals contamination level, bioavailability and toxicity in sediments from Dakar coast and Saint Louis estuary in Senegal, West Africa. *Chemosphere* 2015, 138, 980–987.
98. Kumar, S.B., Padhi, R.K., Mohanty, A.K., Satpathy, K.K. Elemental distribution and trace metal contamination in the surface sediment of south east coast of India. *Mar. Pollut. Bull.* 2017, 114, 1164–1170.

99. Pourkerman, M., Amjadi, S., Beni, A.N., Lahijani, H., Mehdinia, A. Evaluation of metal contamination in the Mand River delta, Persian Gulf. *Mar. Pollut. Bull.* 2017, 119, 261–267.
100. Kusin, F.M., Azani, N.N.M., Hasan, S.N.M.S. Sulong, N.A. Distribution of heavy metals and metalloid in surface sediments of heavily-mined area for bauxite ore in Pengerang, Malaysia and associated risk assessment. *Catena*, 2018, 165, 454-464.
101. Gholizadeh, M. Patimar, R. Ecological risk assessment of heavy metals in surface sediments from the Gorgan Bay, Caspian Sea. *Mar. Pollut. Bull.*, 2018, 137, 662-667.
102. Wang, G., Hu, X., Zhu, Y., Jiang, H. and Wang, H. Historical accumulation and ecological risk assessment of heavy metals in sediments of a drinking water lake. *Environ. Sci. Pollut. Res.*, 2018, 25(25), 24882-24894.
103. Proshad, R., Islam, M.S., Kormoker, T., Masud, M.E.M. Ali, M.M. Assessment of toxic metals contamination with ecological risk of surface water and sediment of Korotoa River in Bangladesh. *Int. J. adv. geosci.*, 2018, 6(2), 214-221.
104. Enuneku, A., Omoruyi, O., Tongo, I., Ogbomida, E., Ogbeide, O. Ezemonye, L. Evaluating the potential health risks of heavy metal pollution in sediment and selected benthic fauna of Benin River, Southern Nigeria. *Appl. Water Sci.*, 2018, 8(8), 1-13.
105. Javed, T., Ahmad, N. Mashiatullah, A. Heavy Metals Contamination and Ecological Risk Assessment in Surface Sediments of Namal Lake, Pakistan. *Pol. J. Environ. Stud.*, 2018, 27(2), 675-688.
106. Proshad, R., Kormoker, T. and Islam, S. Distribution, source identification, ecological and health risks of heavy metals in surface sediments of the Rupsa River, Bangladesh. *Toxin Rev.*, 2019, DOI: 10.1080/15569543.2018.1564143
107. Kormoker, T., Proshad, R. Islam, M.S. Ecological risk assessment of heavy metals in sediment of the Louhajang River, Bangladesh. *SF J Environ Earth Sci.* 2019; 2 (2), 1030
108. Živković, N., Takić, L., Djordjević, L., Djordjević, A., Mladenović-Ranisavljević, I., Golubović, T. Božilov, A. Concentrations of heavy metal cations and a health risk assessment of sediments and river surface water: a case study from a Serbian mine. *Pol. J. Environ. Stud.* 2019, 28(3), 2009-2020.
109. Siddiqui, E. and Pandey, J. Assessment of heavy metal pollution in water and surface sediment and evaluation of ecological risks associated with sediment contamination in the Ganga River: a basin-scale study. *Environ. Sci. Pollut. Res.*, 2019, 26(11), 10926-10940.
110. Wang, M., Liu, J. Lai, J. Metals pollution and ecological risk assessment of sediments in the Poyang Lake, China. *Bull Environ Contam Toxicol.*, 2019, 102(4), 511-518
111. El-Kady, A.A., Wade, T.L., Sweet, S.T. Klein, A.G. Spatial distribution and ecological risk assessment of trace metals in surface sediments of Lake Qaroun, Egypt. *Environ. Monit. Assess.*, 2019, 191(7), pp.1-13.
112. Xiao, H., Shahab, A., Li, J., Xi, B., Sun, X., He, H. Yu, G. Distribution, ecological risk assessment and source identification of heavy metals in surface sediments of Huixian karst wetland, China. *Ecotoxicol. Environ. Saf.* 2019, 185, 109700.
113. Emenike, P.C., Tenebe, I.T., Neris, J.B., Omole, D.O., Afolayan, O., Okeke, C.U. and Emenike, I.K., An integrated assessment of land-use change impact, seasonal variation of pollution indices and human health risk of selected toxic elements in sediments of River Atuwara, Nigeria. *Environ. Pollut.* 2020, 265, 114795.
114. Zerizghi, T., Yang, Y., Wang, W. *et al.* Ecological risk assessment of heavy metal concentrations in sediment and fish of a shallow lake: a case study of Baiyangdian Lake, North China. *Environ Monit Assess.* 2020, 192, 154. <https://doi.org/10.1007/s10661-020-8078-8>.
115. Algül, F. Beyhan, M., Concentrations and sources of heavy metals in shallow sediments in Lake Bafa, Turkey. *Sci. Rep.*, 2020, 10(1), 1-12.
116. Sudarshan, P., Mahesh, M.K. Ramachandra, T.V. Dynamics of metal pollution in sediment and macrophytes of Varthur Lake, Bangalore. *Bull Environ Contam Toxicol.*, 2020, 104(4), 411-417.
117. Ahamad, M.I., Song, J., Sun, H., Wang, X., Mehmood, M.S., Sajid, M., Su, P. Khan, A.J. Contamination level, ecological risk, and source identification of heavy metals in the hyporheic zone of the Weihe River, China. *Int. J. Environ. Res. Public Health*, 2020, 17, 1070.
118. Ustaoglu, F. Ecotoxicological risk assessment and source identification of heavy metals in the surface sediments of Çömlekci stream, Giresun, Turkey. *Environ. Forensics*, 2021, 22(1-2), 130-142.
119. Sadeghi, P., Loghmani, M., Yousuf, D.J. Abadi, Z.T.R. Ecological and human health risk assessment of trace element pollution in sediments and five important commercial fishes of the Oman Sea. *Mar. Pollut. Bull.*, 2021, 173, 112962.

120. Goher, M.E., Mangood, A.H., Mousa, I.E., Salem, S.G., Hussein, M.M. Ecological risk assessment of heavy metal pollution in sediments of Nile River, Egypt. *Environ. Monit. Assess.*, 2021, 193(11), 1-16.
121. Talukder, R., Rabbi, M.H., Baharim, N.B., Carnicelli, S. Source identification and ecological risk assessment of heavy metal pollution in sediments of Setiu wetland, Malaysia. *Environ. Forensics*, 2022, 23(1-2), 241-254.
122. Li, F., Yu, X., Lv, J., Wu, Q., An, Y. Assessment of heavy metal pollution in surface sediments of the Chishui River Basin, China. *PloS one*, 2022, 17(2), e0260901.
123. Iordache, A.M., Nechita, C., Zgavarogea, R., Voica, C., Varlam, M., Ionete, R.E. Accumulation and ecotoxicological risk assessment of heavy metals in surface sediments of the Olt River, Romania. *Sci. Rep.*, 2022, 12(1), 1-11.
124. Acharjee, A., Ahmed, Z., Kumar, P., Alam, R., Rahman, M.S., Simal-Gandara, J. Assessment of the Ecological Risk from Heavy Metals in the Surface Sediment of River Surma, Bangladesh: Coupled Approach of Monte Carlo Simulation and Multi-Component Statistical Analysis. *Water*, 2022, 14(2), 180.
125. Liu, H., Liu, E., Yu, Z., Lin, Q., Zhang, E., Shen, J. Spatio-temporal accumulation patterns of trace metals in sediments of a large plateau lake (Erhai) in Southwest China and their relationship with human activities over the past century. *J. Geochem. Explor.*, 2022, 234, 106943.
